# Supplementary material for: SARS-CoV-2-specific CD4+ and CD8+ T cell responses can originate from cross-reactive CMV-specific T cells
Source: eLife. 2022 Nov 21;11:e82050. doi: 10.7554/eLife.82050 (PMC9822249; doi:10.7554/eLife.82050)
Supplement: Figure 1—source data 1. [file elife-82050-fig1-data1.xlsx]

## Sheet: Information
	Flow cytometry data was analysed in FlowJo v10.7.1
	Samples were excluded from the analysis if less than 10.000 events in CD4+ or CD8+ gate was measured or if after further testing they appeared not to be αβ T cells.
	CD4+ T cell responses were measured by gating on CD154 and CD137 double positive cells.
	CD8+ T cell responses were measured by gating on CD137 and IFN-γ double positive cells.
	Percentages are corrected for background measured in negative control (DMSO).
	These percentages are shown in this workbook in sheet "CD4+ T cell responses" and "CD8+ T cell responses".
	As also shown in these sheets, all values lower than 0.001 were set to the lower limit of detection (LLoD) of 0.001 in order to make data points visible in figures with log scale.

## Sheet: CD4+ T cell responses
	CMV seropositive donors:
	UAB	UBL	UBQ	UBV	UBW	UDP	UDS	UDV	UEN	UES	UFL	UGT	UHJ	UJO	UKU	UNF	UNK	UPJ	UQT	URK	UTT	UUC	UVA	UVF	UVO	UWT	UXY	UZZ
S	-0.0001	-0.00926	0.00321	0.00565	0	0.00011	0.01081	0	0.00344	0.019	0.00272	0.06	0.035	0	-0.00157	0.02943	0.04	0.00519	0.028	0.054	0.00148	0.00913	0.01297	0.00443	0	0.00749	0.00402	0.00155
S1	-0.0001	-0.00931	0.00756	0.00465	0	0.00593	0.00327	0	0.00663	0.00752	0.0028	0.012	0.053	0	0.00164	0.01243	0.016	0.00419	0.00635	0.035	0.00777	0.00514	0.00997	0.0027	0.0017	0.00015	0.00099	0.00911
S+	0.00122	-0.00353	0.00756	0.00272	0.00111	-0.00269	0.00303	0.00358	0.00054	0.03	0.00324	0.00488	-0.006	0.00382	0.00017	0.01943	0.015	0.00919	0.00627	0.00732	0.0015	0.00706	0.00897	0.00382	0.0046	-0.0001	0.01656	0.00311
M	-0.00079	-0.00991	0.00279	0.00235	0.00241	0.00257	0.02581	0	0.00052	0.00303	0.00208	0.13	0.237	0	-0.00126	0.08143	0.006	0.00419	0.031	0.091	0.00177	0.011	0.00762	-0.00167	0	-0.00016	0.00235	-0.00525
N	-0.00149	-0.00918	0.00442	0.00965	0.00158	0.01031	0.0022	0	-0.00289	0.00695	-9e-05	0.00133	0	0	-0.00129	0.00656	0.017	0.00419	0.00596	0.00492	0.00157	0	0.01297	0.00033	0	-0.00176	0.00121	-0.00249
PP65	0.03051	-0.00821	0.014	0.22365	0.16	0.02031	0.09881	0.0097	0.03363	0.26	0.00252	0.12	0.317	0.035	1.26692	2.12843	0.514	0.03519	0.084	0.25	0.02	0.035	0.15797	0.01033	0.015	0.08249	0.08956	0.15211
	MINIMUM OF 0,001
	UAB	UBL	UBQ	UBV	UBW	UDP	UDS	UDV	UEN	UES	UFL	UGT	UHJ	UJO	UKU	UNF	UNK	UPJ	UQT	URK	UTT	UUC	UVA	UVF	UVO	UWT	UXY	UZZ
S	0.01	0.01	0.01	0.01	0.01	0.01	0.01081	0.01	0.01	0.019	0.01	0.06	0.035	0.01	0.01	0.02943	0.04	0.01	0.028	0.054	0.01	0.01	0.01297	0.01	0.01	0.01	0.01	0.01
S1	0.01	0.01	0.01	0.01	0.01	0.01	0.01	0.01	0.01	0.01	0.01	0.012	0.053	0.01	0.01	0.01243	0.016	0.01	0.01	0.035	0.01	0.01	0.01	0.01	0.01	0.01	0.01	0.01
S+	0.01	0.01	0.01	0.01	0.01	0.01	0.01	0.01	0.01	0.03	0.01	0.01	0.01	0.01	0.01	0.01943	0.015	0.01	0.01	0.01	0.01	0.01	0.01	0.01	0.01	0.01	0.01656	0.01
M	0.01	0.01	0.01	0.01	0.01	0.01	0.02581	0.01	0.01	0.01	0.01	0.13	0.237	0.01	0.01	0.08143	0.01	0.01	0.031	0.091	0.01	0.011	0.01	0.01	0.01	0.01	0.01	0.01
N	0.01	0.01	0.01	0.01	0.01	0.01031	0.01	0.01	0.01	0.01	0.01	0.01	0.01	0.01	0.01	0.01	0.017	0.01	0.01	0.01	0.01	0.01	0.01297	0.01	0.01	0.01	0.01	0.01
PP65	0.03051	0.01	0.014	0.22365	0.16	0.02031	0.09881	0.01	0.03363	0.26	0.01	0.12	0.317	0.035	1.26692	2.12843	0.514	0.03519	0.084	0.25	0.02	0.035	0.15797	0.01033	0.015	0.08249	0.08956	0.15211
	CMV seronegative donors:
	UBD	UBT	UBZ	UCU	UDB	UFU	UGI	UGM	UGV	UGZ	UHC	UHL	UHO	UHS	UHZ	UJC	UJS	UKI	UKY	UKZ	ULL	UML	UMV	UPF	UPN	UQS	URG	URJ	URU	URV	USB	USD	USH	USI	USY	UUG	UWI	UWU	UYS
S	0.00491	0.00505	0.00194	0.00129	0.012	0.015113	-0.00032	0.00277	0.00531	0.00399	0.007541	0.00199	0.016	0.00399	0.00618	0.00743	0.00219	0.01255	0.00218	-0.00855	-0.00016	0.00691	0.00365	0.00221	-0.00154	0.00881	0.003962	-0.00144	0.0117	0.00288	-0.00268	0.019	-0.00104	0.00766	0.03837	0.03882	-0.00046	0.00742	0.00753
S1	0.00724	0.01335	0.0081	0.0021	0.0028	0.004693	0.00141	0.00158	0.00116	0.00159	0.006521	0	0.00692	0.01087	-0.00582	0.00056	0.00476	0.00105	0.00026	-0.00671	-0.00156	0.02698	0.013	0.00894	0.00392	0.0012	0.006192	0.00171	0.0117	0.00639	-0.00933	0.043	-0.0021	0.01166	0.01837	-0.00076	0.00648	0.01342	0.00353
S+	0.00596	0.01035	0.00581	0.00221	0.00856	0.010113	0.02835	-0.00049	0.00828	0.0045	0.003031	0.00279	0.012	0.00987	0.01218	0.01143	0.00433	0.01755	0.00499	-0.015	0.00087	0.00266	0.012	0.022	0.00541	0.00219	0.006082	0.00289	0.00584	0.0061	-0.00336	0.1	0.0079	0.00417	0.03237	-0.00618	0.00018	0.01542	0.01753
M	0.00104	-0.00019	0.00624	0.00165	0.00649	0.005083	-0.00043	0.0001	0.00718	0	0.006381	0.00336	0.00251	0.00687	0.00918	-0.00063	0	0.00389	0.0003	-0.00747	-0.000696	0.00179	0.00627	0.00385	-0.0017	-0.00101	0.003622	0.0036	0.00597	0.00588	-0.00643	0.00748	0.00363	-0.00162	0.00937	0.0001	0.00236	0.00171	0.00153
N	0.00054	0.00602	0.00302	0.0045	0.00274	-0.000887	0.00619	4e-05	0	0.00398	0.006161	0.0012	0.00433	-0.00077	0.0003	0.00943	0.00231	0.00142	0.00071	0.009	0.00116	0.00549	0.00378	0.00372	8e-05	0.00015	0.001322	0.00418	0.0117	0.00164	-0.00516	0.013	-0.0021	0.00113	0.02037	-0.00072	-0.00452	0.01042	0.00036
PP65	0.00228	0.00252	0.013	0	0.011	0.014113	0.00735	-0.00322	0.00472	0.003	0.006281	0.00438	0.00417	0.00355	-0.00582	-0.00234	0.00501	0.00298	0.00393	-0.00736	0.00021	0.00397	0.00664	0.00392	-0.00034	0.00328	-0.000998	0.00036	0.0137	0.00433	-0.00612	0.026	0.00081	0.00321	0.02237	0.01182	0.00147	0.02042	0.00453
	MINIMUM OF 0,001
	UBD	UBT	UBZ	UCU	UDB	UFU	UGI	UGM	UGV	UGZ	UHC	UHL	UHO	UHS	UHZ	UJC	UJS	UKI	UKY	UKZ	ULL	UML	UMV	UPF	UPN	UQS	URG	URJ	URU	URV	USB	USD	USH	USI	USY	UUG	UWI	UWU	UYS
S	0.01	0.01	0.01	0.01	0.012	0.015113	0.01	0.01	0.01	0.01	0.01	0.01	0.016	0.01	0.01	0.01	0.01	0.01255	0.01	0.01	0.01	0.01	0.01	0.01	0.01	0.01	0.01	0.01	0.0117	0.01	0.01	0.019	0.01	0.01	0.03837	0.03882	0.01	0.01	0.01
S1	0.01	0.01335	0.01	0.01	0.01	0.01	0.01	0.01	0.01	0.01	0.01	0.01	0.01	0.01087	0.01	0.01	0.01	0.01	0.01	0.01	0.01	0.02698	0.013	0.01	0.01	0.01	0.01	0.01	0.0117	0.01	0.01	0.043	0.01	0.01166	0.01837	0.01	0.01	0.01342	0.01
S+	0.01	0.01035	0.01	0.01	0.01	0.010113	0.02835	0.01	0.01	0.01	0.01	0.01	0.012	0.01	0.01218	0.01143	0.01	0.01755	0.01	0.01	0.01	0.01	0.012	0.022	0.01	0.01	0.01	0.01	0.01	0.01	0.01	0.1	0.01	0.01	0.03237	0.01	0.01	0.01542	0.01753
M	0.01	0.01	0.01	0.01	0.01	0.01	0.01	0.01	0.01	0.01	0.01	0.01	0.01	0.01	0.01	0.01	0.01	0.01	0.01	0.01	0.01	0.01	0.01	0.01	0.01	0.01	0.01	0.01	0.01	0.01	0.01	0.01	0.01	0.01	0.01	0.01	0.01	0.01	0.01
N	0.01	0.01	0.01	0.01	0.01	0.01	0.01	0.01	0.01	0.01	0.01	0.01	0.01	0.01	0.01	0.01	0.01	0.01	0.01	0.01	0.01	0.01	0.01	0.01	0.01	0.01	0.01	0.01	0.0117	0.01	0.01	0.013	0.01	0.01	0.02037	0.01	0.01	0.01042	0.01
PP65	0.01	0.01	0.013	0.01	0.011	0.014113	0.01	0.01	0.01	0.01	0.01	0.01	0.01	0.01	0.01	0.01	0.01	0.01	0.01	0.01	0.01	0.01	0.01	0.01	0.01	0.01	0.01	0.01	0.0137	0.01	0.01	0.026	0.01	0.01	0.02237	0.01182	0.01	0.02042	0.01

## Sheet: CD8+ T cell responses
	CMV seropositive donors:
	UAB	UBL	UBQ	UBV	UBW	UDP	UDS	UDV	UEN	UES	UFL	UGT	UHJ	UJO	UKU	UNF	UNK	UPJ	UQT	URK	UTT	UUC	UVA	UVF	UVO	UWT	UXY	UZZ
S	0.321	-0.013	-0.00245	0.14094	0	-0.014	-0.054	-0.016	-0.00411	0.00142	0.00109	0.00186	-0.00512	0.00759	0.01176	-0.00594	0.00467	-0.107	0.00665	0.00522	0.185	0.00515	0.01	0	0	-0.00782	-0.002	-0.102
S1	0.121	0.03	-0.00372	-0.00389	0	-0.009	-0.06469	-0.00617	-0.00173	-0.00424	-0.00181	-0.00376	-0.00319	0.01	-0.00273	-0.0061	0.015	-0.096	0.00167	-0.00032	0.003	0.00246	-0.01	0.00269	0.00237	-0.01046	-0.02001	-0.109
S+	0.06	0.02	-0.00252	-0.00471	0.00197	-0.006	-0.07	-0.006	-0.00256	-0.00424	-0.00448	-0.002893	-0.00446	0.00764	-0.00524	-0.01	0.035	-0.098	0.00372	-0.00273	-0.002	0.00256	-0.007	0.00226	0	-0.00873	-0.01872	-0.104
M	0.151	0.02	-0.0028	-0.0007	0	-0.01989	-0.06268	-0.01033	-0.00415	-0.00122	-0.00125	0.03324	-0.00821	0.00625	-0.00524	-0.00738	0.00423	-0.102	0.00245	-0.00273	0.006	0.00468	-0.007	0	0	-0.0114	-0.005	-0.1
N	0.036	0.003	-0.00374	-0.00906	0	-0.01992	-0.06679	-0.001	-0.00535	0.00676	0.00373	-0.00012	-0.00404	0.00936	-0.00378	-0.01	0	-0.113	0.00385	0.00419	0.004	0.00521	0	0	0	-0.01232	-0.02392	-0.11838
PP65	0.421	0.287	0.05992	1.07094	0.32	-0.005	0.09	-0.016	0.42465	2.42576	0.08452	0.76624	0.739	1.47	6.01476	0.93	0.19	0.28	0.72	0.79727	0.695	1.66	1.506	0.31	0.037	-0.00492	0.635	1.78
	MINIMUM OF 0,001
	UAB	UBL	UBQ	UBV	UBW	UDP	UDS	UDV	UEN	UES	UFL	UGT	UHJ	UJO	UKU	UNF	UNK	UPJ	UQT	URK	UTT	UUC	UVA	UVF	UVO	UWT	UXY	UZZ
S	0.321	0.01	0.01	0.14094	0.01	0.01	0.01	0.01	0.01	0.01	0.01	0.01	0.01	0.01	0.01176	0.01	0.01	0.01	0.01	0.01	0.185	0.01	0.01	0.01	0.01	0.01	0.01	0.01
S1	0.121	0.03	0.01	0.01	0.01	0.01	0.01	0.01	0.01	0.01	0.01	0.01	0.01	0.01	0.01	0.01	0.015	0.01	0.01	0.01	0.01	0.01	0.01	0.01	0.01	0.01	0.01	0.01
S+	0.06	0.02	0.01	0.01	0.01	0.01	0.01	0.01	0.01	0.01	0.01	0.01	0.01	0.01	0.01	0.01	0.035	0.01	0.01	0.01	0.01	0.01	0.01	0.01	0.01	0.01	0.01	0.01
M	0.151	0.02	0.01	0.01	0.01	0.01	0.01	0.01	0.01	0.01	0.01	0.03324	0.01	0.01	0.01	0.01	0.01	0.01	0.01	0.01	0.01	0.01	0.01	0.01	0.01	0.01	0.01	0.01
N	0.036	0.01	0.01	0.01	0.01	0.01	0.01	0.01	0.01	0.01	0.01	0.01	0.01	0.01	0.01	0.01	0.01	0.01	0.01	0.01	0.01	0.01	0.01	0.01	0.01	0.01	0.01	0.01
PP65	0.421	0.287	0.05992	1.07094	0.32	0.01	0.09	0.01	0.42465	2.42576	0.08452	0.76624	0.739	1.47	6.01476	0.93	0.19	0.28	0.72	0.79727	0.695	1.66	1.506	0.31	0.037	0.01	0.635	1.78
	CMV seronegative donors:
	UBD	UBT	UBZ	UCU	UDB	UFU	UGI	UGM	UGV	UGZ	UHC	UHL	UHO	UHS	UHZ	UJC	UJS	UKI	UKY	UKZ	ULL	UML	UMV	UPF	UPN	UQS	URG	URJ	URU	URV	USB	USD	USH	USI	USY	UUG	UWI	UWU	UYS
S	0.00312	0	-0.0085	0	-0.00646	0.00668	-0.00835	-0.00237	0.002	0	-0.00601	0	0.001	-0.036	-0.01031	-0.02102	-0.025	0.00158	-0.00726	0.019	-0.03515	-0.00468	-0.02808	-0.00211	0	-0.00546	-0.00897	-0.036	0.01	0.00989	0.00398	-0.004	0.00538	0.00221	0.0012	-0.01021	-0.00688	-0.003	-0.09197
S1	0.001	0	-0.0085	0	-0.00613	0.00117	-0.00835	-0.00237	0	0	-0.00332	0.00172	0.00014	-0.01	-0.015	-0.008	-0.025	-0.00042	-0.00621	0.019	-0.03707	-0.003	-0.03301	0.00171	0.00546	-0.00156	-0.014	-0.043	0.00164	0.03289	0.00426	-0.00422	0.00761	0	-0.00116	-0.014	-0.00397	0.00055	-0.077
S+	-4e-05	0	-0.0085	0	-0.00953	0.00601	-0.00835	-0.00237	0	0.00374	-0.00866	0.00169	-0.00154	0.03	-0.001	-0.015	-0.025	-0.00143	-0.00726	0.01	-0.03465	-0.00127	-0.02907	-0.00232	0.00731	-0.00791	-0.00658	-0.04981	0.00394	0.04089	0.00266	-0.00887	0.00297	0.0066	-0.00113	-0.01033	-0.01	0.00307	-0.09558
M	0.00119	0	-0.0085	0.00186	-0.00691	0.0037	-0.00835	-0.00237	0.0021	0	-0.011	0	-7e-05	0.01	-0.00716	-0.02513	-0.025	-0.00138	-0.00868	0.004	-0.03764	0.00045	-0.02917	-0.00236	0	-0.00549	-0.002	-0.04	0.00462	0.01989	0.01	-0.01144	0.00879	0.00251	-0.00029	-0.00976	-0.00704	0.00607	-0.085
N	-0.00115	0.00269	-0.0085	0.00345	-0.00664	0	-0.00835	-0.00237	0	0.0025	-0.011	0.00217	0.00195	-0.036	-0.01028	-0.015	-0.025	-0.00019	-0.00696	0.038	-0.03924	0.00319	-0.03628	-0.00394	0.00434	-0.00778	-0.00844	-0.04774	0.00901	0.02989	0.00248	-0.01192	0.013	0.00438	0.00323	-0.01033	-0.00422	0.00507	-0.09111
PP65	-0.00115	0	-0.0085	0	-0.00991	0	-0.00835	-0.00237	0.00336	0	-0.00629	0	0.00013	-0.049	-0.015	-0.02404	-0.025	-0.00013	-0.00868	0.049	-0.03844	-0.00236	-0.0343	-0.00069	0	-0.00792	-0.00547	-0.043	0.0084	0.01589	0	-0.0073	0.00493	0.00476	0.00177	-0.00428	-0.01	-0.00034	-0.1
	MINIMUM OF 0,001
	UBD	UBT	UBZ	UCU	UDB	UFU	UGI	UGM	UGV	UGZ	UHC	UHL	UHO	UHS	UHZ	UJC	UJS	UKI	UKY	UKZ	ULL	UML	UMV	UPF	UPN	UQS	URG	URJ	URU	URV	USB	USD	USH	USI	USY	UUG	UWI	UWU	UYS
S	0.01	0.01	0.01	0.01	0.01	0.01	0.01	0.01	0.01	0.01	0.01	0.01	0.01	0.01	0.01	0.01	0.01	0.01	0.01	0.019	0.01	0.01	0.01	0.01	0.01	0.01	0.01	0.01	0.01	0.01	0.01	0.01	0.01	0.01	0.01	0.01	0.01	0.01	0.01
S1	0.01	0.01	0.01	0.01	0.01	0.01	0.01	0.01	0.01	0.01	0.01	0.01	0.01	0.01	0.01	0.01	0.01	0.01	0.01	0.019	0.01	0.01	0.01	0.01	0.01	0.01	0.01	0.01	0.01	0.03289	0.01	0.01	0.01	0.01	0.01	0.01	0.01	0.01	0.01
S+	0.01	0.01	0.01	0.01	0.01	0.01	0.01	0.01	0.01	0.01	0.01	0.01	0.01	0.03	0.01	0.01	0.01	0.01	0.01	0.01	0.01	0.01	0.01	0.01	0.01	0.01	0.01	0.01	0.01	0.04089	0.01	0.01	0.01	0.01	0.01	0.01	0.01	0.01	0.01
M	0.01	0.01	0.01	0.01	0.01	0.01	0.01	0.01	0.01	0.01	0.01	0.01	0.01	0.01	0.01	0.01	0.01	0.01	0.01	0.01	0.01	0.01	0.01	0.01	0.01	0.01	0.01	0.01	0.01	0.01989	0.01	0.01	0.01	0.01	0.01	0.01	0.01	0.01	0.01
N	0.01	0.01	0.01	0.01	0.01	0.01	0.01	0.01	0.01	0.01	0.01	0.01	0.01	0.01	0.01	0.01	0.01	0.01	0.01	0.038	0.01	0.01	0.01	0.01	0.01	0.01	0.01	0.01	0.01	0.02989	0.01	0.01	0.013	0.01	0.01	0.01	0.01	0.01	0.01
PP65	0.01	0.01	0.01	0.01	0.01	0.01	0.01	0.01	0.01	0.01	0.01	0.01	0.01	0.01	0.01	0.01	0.01	0.01	0.01	0.049	0.01	0.01	0.01	0.01	0.01	0.01	0.01	0.01	0.01	0.01589	0.01	0.01	0.01	0.01	0.01	0.01	0.01	0.01	0.01
