# Supplementary material for: SARS-CoV-2-specific CD4+ and CD8+ T cell responses can originate from cross-reactive CMV-specific T cells
Source: eLife. 2022 Nov 21;11:e82050. doi: 10.7554/eLife.82050 (PMC9822249; doi:10.7554/eLife.82050)
Supplement: Figure 5—source data 1. [file elife-82050-fig5-data1.xlsx]

## Sheet: Information
Figure #	Sheet name			Additional information:
1	1 UTT IPS FVS			Hidden rows contain non-productive sequences
2	2 UBV IPS FVS			Counts of exact same TCR sequences (exact same CDR3 nucleotide sequence, joining segment and variable segment) are pooled.
3	3 SFW IPS FVS			CASSLALDEQFF and CAGNQGGKLIF are in bold
4	4 JZX IPS FVS			If CASSLALDEQFF and CAGNQGGKLIF occure twice in a sample, then the differences are depicted in bold and font size 14
5	5 UTT IPS
6	6 UBV IPS			For figure in manuscript:
7	7 SFW IPS			Clone counts with the same CDR3 amino acid sequence were pooled.
8	8 JZX IPS			Clone counts below 50 were excluded.
				Abundance in percentage was calculated per unique CDR3 amino acid sequence.

## Sheet: 1 UTT IPS FVS
cloneCount	targetSequences	aaSeqCDR3	productiveTCR	V_gene	D_gene	J_gene	Column1
478271	TGTGCTGGGAACCAGGGAGGAAAGCTTATCTTC	CAGNQGGKLIF	TRUE	TRAV21*02	NA	TRAJ23*01
369304	TGTGCCAGCAGTTTAGCGCTGGATGAGCAGTTCTTC	CASSLALDEQFF	TRUE	TRBV12-3*01	NA	TRBJ2-1*01
20152	TGTGTGGTGTCGACGGAGGGGAATATGGAAACAAACTGGTCTTT	CVVSTEG_YGNKLVF	FALSE	TRAV12-1*02	NA	TRAJ47*01
7600	TGTGTGGTGTCGACGGAGGGGAATATGGAAACAAACTGGTCTTT	CVVSTEG_YGNKLVF	FALSE	TRAV12-1*01	NA	TRAJ47*01
2191	TGTGCCAGCAGTTACCCAGAGGGGACTAGCGGGGGGGTTCTGCACAGATACGCAGTATTTT	CASSYPEGTS_GGFCTDTQYF	FALSE	TRBV6-8*01	TRBD2*01	TRBJ2-3*01
2135	TGTGCCAGCAGTGCTACAGGGGTTGAAGCTTTCTTT	CASSATGVEAFF	TRUE	TRBV6-3*01	TRBD1*01	TRBJ1-1*01
781	TGTGCCAGCAGTGCTACAGGGGTTGAAGCTTTCTTT	CASSATGVEAFF	TRUE	TRBV6-2*01	TRBD1*01	TRBJ1-1*01
702	TGTGCAATGAGACCTTTATAATGCTGGCAACAACCGTAAGCTGATTTGG	CAMRPL*C_GNNRKLIW	FALSE	TRAV14/DV4*01	NA	TRAJ38*01
578	TGTGCCAGCAGCTTAAGCCTAGCGGGATCTACAGATACGCAGTATTTT	CASSLSLAGSTDTQYF	TRUE	TRBV7-3*01	TRBD2*02	TRBJ2-3*01
535	TGCAGTGTTCTCAAGGACAGAATGAAAAACTGTTTTTT	CSVLKD_NEKLFF	FALSE	TRBV20-1*01	TRBD1*01	TRBJ1-4*01
446	TGCGCCAGCAGCCAACTCGGGACGGGTAGCTCCTACGAGCAGTACTTC	CASSQLGTGSSYEQYF	TRUE	TRBV4-1*01	TRBD1*01	TRBJ2-7*01
380	TGTGCCAGCAGCTCGGGACAGCTCAGGCCGCCTCGAGACCCAGTACTTC	CASSSGQL_GRLETQYF	FALSE	TRBV5-4*01	TRBD1*01	TRBJ2-5*01
300	TGTGCCAGCAGTTTAGCACTAGACGAGCAGTTCTTC	CASSLALDEQFF	TRUE	TRBV12-4*01	NA	TRBJ2-1*01
290	TGCAGTGTTCTCAAGGACAGAATGAAAAACTTTTTT	CSVLKDRMKNFF	TRUE	TRBV20-1*01	TRBD1*01	TRBJ1-4*01
206	TGCAGTGTTCTCAAGGACAGAATGAAAAACTGTTTTTT	CSVLKD_NEKLFF	FALSE	TRBV20-1*05	TRBD1*01	TRBJ1-4*01
162	TGCGCCAGCAGCCCCCGGGACAGGGACTTTTACGGGGAGCTGTTTTTT	CASSPRDRDFYGELFF	TRUE	TRBV4-3*01	TRBD1*01	TRBJ2-2*01
155	TGTGCCGCGTCTCGGGGCTGTGAGCCAAAAACATTCAGTACTTC	CAASRGC_AKNIQYF	FALSE	TRBV3-1*02	TRBD1*01	TRBJ2-4*01
97	TGTGCCAGCAGCTTAGAACTAGCAATGGAAGAGACCCAGTACTTC	CASSLELAMEETQYF	TRUE	TRBV7-9*03	TRBD2*01	TRBJ2-5*01
52	TGTGCAATGAGTCGCGGATCTGAAAAGCTGGTCTTT	CAMSRGSEKLVF	TRUE	TRAV12-3*01	NA	TRAJ57*01
	50 reads threshold
45	TGTGCCAGCACCCCCAGGGAGCGGGAGAACACCTACGAGCAGTACTTC	CASTPRERENTYEQYF	TRUE	TRBV6-5*01	TRBD2*02	TRBJ2-7*01
38	TGCGCCAGCAGCCCGCAGGGTGCAGGCCCTTTAGACGAGCAGTACTTC	CASSPQGAGPLDEQYF	TRUE	TRBV5-1*01	TRBD2*02	TRBJ2-7*01
29	TGTGCCAGCAGTGACGGGGCGGGAGACAATGAGCAGTTCTTC	CASSDGAGDNEQFF	TRUE	TRBV6-4*01	TRBD2*02	TRBJ2-1*01
21	TGCAGTGCTAGTTTGGGAGGGGGCGAGCAGTACTTC	CSASLGGGEQYF	TRUE	TRBV20-1*04	TRBD2*02	TRBJ2-7*01
16	TGTGCCACGTCAGACAGGACAGGCCAGTACGAGCAGTACTTC	CATSDRTGQYEQYF	TRUE	TRBV15*02	TRBD1*01	TRBJ2-7*01
15	TGTGCCAGCAGCCTAACAGGGGTAGAAGCTTTCTTT	CASSLTGVEAFF	TRUE	TRBV6-2*01	TRBD1*01	TRBJ1-1*01
10	TGTGCCAGCAGCTTAGATTTGGGCTCCACTGAAGCTTTCTTT	CASSLDLGSTEAFF	TRUE	TRBV11-3*01	NA	TRBJ1-1*01
10	TGTGCCAGCAGTCCTACGACAGGCGAGTACAGCGGTAATGAAAAACTGTTTTTT	CASSPTTGEYSGNEKLFF	TRUE	TRBV28*01	TRBD1*01	TRBJ1-4*01
9	TGCGCCAGCAGCTTGGAGGGACAGGGTAACACTGAAGCTTTCTTT	CASSLEGQGNTEAFF	TRUE	TRBV5-1*01	TRBD1*01	TRBJ1-1*01
8	TGTGCCAGCAGTGAATATCCCCTGGGGGGCACTGAAGCTTTCTTT	CASSEYPLGGTEAFF	TRUE	TRBV6-1*01	TRBD1*01	TRBJ1-1*01
8	TGTGCCAGCTCACCCGAGGGACAGTACTATGAAAAACTGTTTTTT	CASSPEGQYYEKLFF	TRUE	TRBV18*01	TRBD1*01	TRBJ1-4*01
7	TGTGCCAGCAGCCCAACAGGGGTCTTCGACGAGCAGTACTTC	CASSPTGVFDEQYF	TRUE	TRBV7-2*01	TRBD1*01	TRBJ2-7*01
6	GGTGCCAGCAGCTCGGGACAGCTCAGGCCGCCTCGAGACCCAGTACTTC	GASSSGQL_GRLETQYF	FALSE	TRBV5-4*01	TRBD1*01	TRBJ2-5*01
6	TGTGCCAGCAATACGGCCCAAGAGACCCAGTACTTC	CASNTAQETQYF	TRUE	TRBV6-1*01	NA	TRBJ2-5*01
6	TGTGCCAGCAGCCAAGGTTGGGGGGAACTACAATGAGCAGTTCTTC	CASSQGWG_NYNEQFF	FALSE	TRBV3-1*01	TRBD2*01	TRBJ2-1*01
5	TGTGCCAGCAGTGAACAGGGCGCCGGACTAGCGGGGTACGAGCAGTACTTC	CASSEQGAGLAGYEQYF	TRUE	TRBV2*01	TRBD2*01	TRBJ2-7*01
5	TGTGCTGAGAGGCGCTGCTGGGCGTCTGGGCGGAGGACTCCTGGTTCTGGGTGCTGGGAGAGCGATGGGGCTCTCAGCGGTGGGAAGGACCCGAGCTGAGTCTGGGACAGCAGAGCGGGCAGCACCGGTTTTTGTCCTGGGCCTCCAGGCTGTGAGCACAGATACGCAGTATTTT	CAERRCWASGRRTPGSGCWESDGALSGGK_TRAESGTAERAAPVFVLGLQAVSTDTQYF	FALSE	TRBV11-3*02	TRBD1*01	TRBJ2-3*01
5	TGCGCCAGCAGCCAAGACCGAGGGGGTGCAGCGGGCGGCTACACCTTC	CASSQDRGGAAGGYTF	TRUE	TRBV4-3*01	TRBD1*01	TRBJ1-2*01
4	TGTGCTGTGAGTGATTGGATAGTGATACTCTGGGGCTGGGAGTTACCAACTCACTTTC	CAVSDWIVIL_GAGSYQLTF	FALSE	TRAV8-6*01	NA	TRAJ28*01
3	TGTGCCACAAGAGGGGACTCCTACGAGCAGTACTTC	CATRGDSYEQYF	TRUE	TRBV19*01	NA	TRBJ2-7*01
3	TGTGCCACCAGCAGAGGAGGAGGAGCGGGAGGCTCCGAGCAGTACTTC	CATSRGGGAGGSEQYF	TRUE	TRBV15*02	TRBD2*02	TRBJ2-7*01
3	TGTGCCAGCAGTCTACTTCTAGCGGGACCCCCCACAGATACGCAGTATTTT	CASSLLLAGPPTDTQYF	TRUE	TRBV6-2*01	TRBD2*02	TRBJ2-3*01
3	TGTGCCAGCAGCCCCGGCACAGGGCCTAATGAAAAACTGTTTTTT	CASSPGTGPNEKLFF	TRUE	TRBV28*01	TRBD1*01	TRBJ1-4*01
3	TGTGCCAGCAGCGTAGAGGGGGGTTACTACAATGAGCAGTTCTTC	CASSVEGGYYNEQFF	TRUE	TRBV9*01	TRBD1*01	TRBJ2-1*01
3	TGTGCAATGAGAGAGGTTAACACCAATGCAGGCAAATCAACCTTT	CAMREVNTNAGKSTF	TRUE	TRAV14/DV4*01	NA	TRAJ27*01
2	TGTGCCAGCAGTGCTACAGGGGTTGAAGCTTTCTTTGGACAAGGCACCAGACTCACAGTTGTAGGGTTAAAATTCTACTAAGGAACAGGAGAGGACCTGGCAGGTGGACTTGGGGAGGCAGGAGTGGAAGGCAGCAGGTCGCGGTTTTCCTTCCAGTCTTTAATGTTGTGCAACTAATGAAAAACTGTTTTTT	CASSATGVEAFFGQGTRLTVVGLKFY*GTGED_WQVDLGRQEWKAAGRGFPSSL*CCATNEKLFF	FALSE	TRBV6-1*01	TRBD2*02	TRBJ1-4*01
2	TGTGCTGAGAGGCGCTGCTGGGCGTCTGGGCGGAGGACTCCTGGTTCTGGGTGCTGGGAGAGCGATGGGGCTCTCAGCGGTGGGAAGGACCCGAGCTGAGTCTGGGACAGCAGAGCGGGCAGCACCGGTTTTTGTCCTGGGCCTCCAGGCTGTGAGCACAGATACGCAGTATTTT	CAERRCWASGRRTPGSGCWESDGALSGGK_TRAESGTAERAAPVFVLGLQAVSTDTQYF	FALSE	TRBV7-6*02	TRBD1*01	TRBJ2-3*01
2	TATGCTGTGAGTGGTCTGATTTTCTCAGCATCTCTGGGGTTTTTGCAAAGAAAGGAAACTCTGTGCATACTCTGGGGCTGGGAGTTACCAACTCACTTTC	YAVSGLIFSASLGFLQR_RKLCAYSGAGSYQLTF	FALSE	TRAV8-4*01	NA	TRAJ28*01
2	TGCGCCAGCAGCCAAGATCGGGGCGTAGGCCAGAACACCGGGGAGCTGTTTTTT	CASSQDRGVGQNTGELFF	TRUE	TRBV4-3*01	TRBD1*01	TRBJ2-2*01
2	TGTGCCAGCAGCTTAGCGGTTTTATCGGGGCAAAATGAAGCTTTCTTT	CASSLAVLSGQNEAFF	TRUE	TRBV7-8*01	TRBD2*01	TRBJ1-1*01
2	TGTGCCAGCAGTTTATCGGGGGGCCCTAATGAAAAACTGTTTTTT	CASSLSGGPNEKLFF	TRUE	TRBV28*01	TRBD2*01	TRBJ1-4*01
2	TGTGCCAGCAGCTTAGAGGGACAGTACTATGAAAAACTGTTTTTT	CASSLEGQYYEKLFF	TRUE	TRBV7-2*02	TRBD1*01	TRBJ1-4*01
2	TGTGCCAGCAGTGCAAGCGGGAATCCCTACGAGCAGTACTTC	CASSASGNPYEQYF	TRUE	TRBV6-1*01	NA	TRBJ2-7*01
2	TGCGCCAGCAGCCCGACAGGGGAGCCCGGTGAGCAGTACTTC	CASSPTGEPGEQYF	TRUE	TRBV4-3*01	TRBD1*01	TRBJ2-7*01
1	TGTGCCAGCAGTTTAGCGCTAGACGAGCAGTACTTC	CASSLALDEQYF	TRUE	TRBV12-3*01	NA	TRBJ2-7*01
1	TGTGCTCTCCGAGGGGAAAGCTTATCTTC	CALRG_KLIF	FALSE	TRAV6*01	NA	TRAJ23*01
1	CGATCTAAGCAGTGGTATCAACGCAGAGTACATGGGGCCACACTCATGATGCACTGTGTAGCAATCAGCCCCAGCATTTT	RSKQWYQRRVHGA_THDALCSNQPQHF	FALSE	TRBV7-3*02	TRBD1*01	TRBJ1-5*01
1	TGTGCCAGCAGTTTAAGGACGGACCATTGGGATGGCTACACCTTC	CASSLRTDHWDGYTF	TRUE	TRBV27*01	NA	TRBJ1-2*01
1	TGTGCCAGCAGCGTAGAGGGGGGCTACTACAATGAGCAGTTCTTC	CASSVEGGYYNEQFF	TRUE	TRBV9*01	NA	TRBJ2-1*01
1	TGTGCCAGCAGCGTAGAGGGGGTTACTACAATGAGCAGTTCTTC	CASSVEG_YYNEQFF	FALSE	TRBV9*01	TRBD1*01	TRBJ2-1*01
1	TGTGCCACCAGCGACAGGACAGGGGAATACGAGCAGTACTTC	CATSDRTGEYEQYF	TRUE	TRBV15*02	TRBD1*01	TRBJ2-7*01
1	TGTGCCACGTCAGACAGGACAGGCCAGTACGAGCAGTACTTT	CATSDRTGQYEQYF	TRUE	TRBV15*02	TRBD1*01	TRBJ2-7*01
1	TGTGCCAGCAGCTTAGAACAGGGACAGGGCGGCTACACCTTC	CASSLEQGQGGYTF	TRUE	TRBV11-2*01	TRBD1*01	TRBJ1-2*01
1	TGTGCCAGCAGCTCCCAGGTCGGGTTCTACGAGCAGTACTTC	CASSSQVGFYEQYF	TRUE	TRBV7-2*01	NA	TRBJ2-7*01
1	TGTGCCAGCAGCGTAGAGGAAGTCACAGATACGCAGTATTTT	CASSVEEVTDTQYF	TRUE	TRBV9*01	NA	TRBJ2-3*01
1	TGCGCCAGCAGTCCTAGTTTACAATGAGCAGTTCTTC	CASSPS_YNEQFF	FALSE	TRBV23-1*01	TRBD2*01	TRBJ2-1*01
1	TGTGCCAGTAGGGGGGACAACTACGAGCAGTACTTC	CASRGDNYEQYF	TRUE	TRBV19*01	TRBD1*01	TRBJ2-7*01
1	TGTGCCAGCAGTCTGGCCCTCGACGAGCAGTACTTC	CASSLALDEQYF	TRUE	TRBV12-3*01	TRBD2*02	TRBJ2-7*01
1	TGTGCTCTCCGAGGGGAAAGCTTATCTTC	CALRG_KLIF	FALSE	TRAV6*02	NA	TRAJ23*01

## Sheet: 2 UBV IPS FVS
cloneCount	targetSequences	aaSeqCDR3	productiveTCR	V_gene	D_gene	J_gene
727231	TGTGCTGGAAACCAGGGAGGAAAGCTTATCTTC	CAGNQGGKLIF	TRUE	TRAV21*01	NA	TRAJ23*01
364599	TGTGCCAGCAGTTTAGCGCTGGATGAGCAGTTCTTC	CASSLALDEQFF	TRUE	TRBV12-3*01	NA	TRBJ2-1*01
199797	TGACTCCTCAGGAACCTACAAATACATCTTT	*LLRN_YKYIF	FALSE	TRAV27*01	NA	TRAJ40*01
15676	TGCAGTGTTCTCAAGGACAGAATGAAAAACTGTTTTTT	CSVLKD_NEKLFF	FALSE	TRBV20-1*01	TRBD1*01	TRBJ1-4*01
7355	TGTGCCAGCAGTTTAGCACTAGACGAGCAGTTCTTC	CASSLALDEQFF	TRUE	TRBV12-3*01	NA	TRBJ2-1*01
6463	TGCAGTGTTCTCAAGGACAGAATGAAAAACTTTTTT	CSVLKDRMKNFF	TRUE	TRBV20-1*01	TRBD1*01	TRBJ1-4*01
5755	TGCAGTGTTCTCAAGGACAGAATGAAAAACTGTTTTTT	CSVLKD_NEKLFF	FALSE	TRBV20-1*02	TRBD1*01	TRBJ1-4*01
144	TGTGCCAGCAGTGCTACAGGGGTTGAAGCTTTCTTT	CASSATGVEAFF	TRUE	TRBV6-2*01	TRBD1*01	TRBJ1-1*01
69	TGCGCCAGCAGCCCGCAGGGTGCAGGCCCTTTAGACGAGCAGTACTTC	CASSPQGAGPLDEQYF	TRUE	TRBV5-1*01	TRBD2*02	TRBJ2-7*01
53	TGTGCAATGAGTCGCGGATCTGAAAAGCTGGTCTTT	CAMSRGSEKLVF	TRUE	TRAV12-3*01	NA	TRAJ57*01
	50 reads threshold
34	TGTGCCAGCAGCTTAAGCCTAGCGGGATCTACAGATACGCAGTATTTT	CASSLSLAGSTDTQYF	TRUE	TRBV7-3*01	TRBD2*02	TRBJ2-3*01
15	TGTGCCAGCAGCTCGGGACAGCTCAGGCCGCCTCGAGACCCAGTACTTC	CASSSGQL_GRLETQYF	FALSE	TRBV5-4*01	TRBD1*01	TRBJ2-5*01
10	TGCGCCAGCAGCCCCCGGGACAGGGACTTTTACGGGGAGCTGTTTTTT	CASSPRDRDFYGELFF	TRUE	TRBV4-3*01	TRBD1*01	TRBJ2-2*01
5	TGTGCTGTGAGTGATTGGATAGTGATACTCTGGGGCTGGGAGTTACCAACTCACTTTC	CAVSDWIVIL_GAGSYQLTF	FALSE	TRAV8-6*01	NA	TRAJ28*01
5	TGGGGCCAACGTCCTGACTTTC	WGQR_LTF	FALSE	TRBV23/OR9-2*01	NA	TRBJ2-6*01
3	TGTGCCAGCAGTGACGGGGCGGGAGACAATGAGCAGTTCTTC	CASSDGAGDNEQFF	TRUE	TRBV6-4*01	TRBD2*02	TRBJ2-1*01
3	GGGCCAGGCACGCGGCTCCTGGTGCTCGGTGAGCGCGGGCTGCTGGGGCGCGGGCGCGGGCGGCTTGGGTCTGGTTTTTGCGGGGAGTCCCCGGGCTGTGCTCTGGGGCCAACGTCCTGACTTTC	GPGTRLLVLGERGLLGRGRGR_WVWFLRGVPGLCSGANVLTF	FALSE	TRBV13*02	TRBD2*01	TRBJ2-6*01
2	TGTGCCAGCAGCTTAGAACTAGCAATGGAAGAGACCCAGTACTTC	CASSLELAMEETQYF	TRUE	TRBV7-9*01	TRBD2*01	TRBJ2-5*01
2	TAGCAGTGGTATCAACGCAGAGTACATGGGAGCAATCAGCCCCAGCATTTT	*QWYQRRVHGSNQPQHF	FALSE	TRBV20-1*02	NA	TRBJ1-5*01
2	TGTGCCAGCAGTTACCCAGAGGGGACTAGCGGGGGGGTTCTGCACAGATACGCAGTATTTT	CASSYPEGTS_GGFCTDTQYF	FALSE	TRBV6-8*01	TRBD2*01	TRBJ2-3*01
2	TGTGCCAGCAGCTTAGAACTAGCAATGGAAGAGACCCAGTACTTC	CASSLELAMEETQYF	TRUE	TRBV7-9*03	TRBD2*01	TRBJ2-5*01
2	TGCAGTGCTAGTTTGGGAGGGGGCGAGCAGTACTTC	CSASLGGGEQYF	TRUE	TRBV20-1*04	TRBD2*02	TRBJ2-7*01
1	GGGCCAGGCACGCGGCTCCTGGTGCTCGGTGAGCGCGGGCTGCTGGGGCGCGGGCGCGGGCGGCTTGGGTCTGGTTTTTGCGGGGAGTCCCCGGGCTGTGCTCTGGGACCAACGTCCTGACTTTC	GPGTRLLVLGERGLLGRGRGR_WVWFLRGVPGLCSGTNVLTF	FALSE	TRBV13*02	TRBD2*01	TRBJ2-6*01
1	TAGCAGTGGTATCAACGCAGAGTACATGGGGGACACTCATGATGCACTGTGTAGCAATCAGCCCCAGCATTTT	*QWYQRRVHGGH_HDALCSNQPQHF	FALSE	TRBV20-1*02	TRBD1*01	TRBJ1-5*01
1	TAGCAGTGGTATCAACGCAGAGTACATGGGGACTTC	*QWYQRRVHGDF	FALSE	TRBV20-1*02	NA	TRBJ2-5*01
1	TGTGCTGAGAGGCGCTGCTGGGCGTCTGGGCGGAGGACTCCTGGTTCTGGGTGCTGGGAGAGCGATGGGGCTCTCAGCGGTGGGAAGGACCCGAGCTGAGTCTGGGACAGCAGAGCGGGCAGCACCGGTTTTTGTCCTGGGCCTCCAGGCTGTGAGCACAGATACGCAGTATTTT	CAERRCWASGRRTPGSGCWESDGALSGGK_TRAESGTAERAAPVFVLGLQAVSTDTQYF	FALSE	TRBV6-6*05	TRBD1*01	TRBJ2-3*01
1	CGATCTAAGCAGTGGTATCAACGCAGAGTACATGGGGAACATTGTGGGGACTAGCGGGGGGCAGGCGTGAGACCCAGTACTTC	RSKQWYQRRVHGEH_WGLAGGRRETQYF	FALSE	TRBV7-3*02	TRBD2*01	TRBJ2-5*01
1	TAGCAGTGGTATCAACGCAGAGTACATGGGGGGGGTTTGCCACACTCATGATGCACTGTGTAGCAATCAGCCCCAGCATTTT	*QWYQRRVHGGGLP_THDALCSNQPQHF	FALSE	TRBV20-1*02	TRBD2*01	TRBJ1-5*01
1	TGTGCTAGGCCTGAGTCAAGGTTATTGCAATAGCACTAAAGACTGTGTAACACCAATGCAGGCAAATCAACCTTT	CARPESRLLQ*H*RLCNTNAGKSTF	FALSE	TRAV8-6*01	NA	TRAJ27*01
1	TAGCAGTGGTATCAACGCAGAGTACATGGGGCCACACTCATGATGCACTGTGTAGCAATCAGCCCCAGCATTTT	*QWYQRRVHGAT_HDALCSNQPQHF	FALSE	TRBV20-1*03	TRBD2*01	TRBJ1-5*01
1	TGTGCCAGCAGCTTAGCGGTTTTATCGGGGCAAAATGAAGCTTTCTTT	CASSLAVLSGQNEAFF	TRUE	TRBV7-8*01	TRBD2*01	TRBJ1-1*01
1	TGTGCCAGCAGCCAAGAAGGGGGCTATTACAATGAGCAGTTCTTC	CASSQEGGYYNEQFF	TRUE	TRBV4-2*01	TRBD1*01	TRBJ2-1*01
1	CGATCTAAGCAGTGGTATCAACGCAGAGTACATGGGGACTTC	RSKQWYQRRVHGDF	TRUE	TRBV7-3*02	TRBD1*01	TRBJ2-5*01
1	TGCAGTGGTATCAACGCAGAGTACATGGGGAGCATTTT	CSGINA_VHGEHF	FALSE	TRBV20-1*02	NA	TRBJ1-5*01
1	TGTGCCAGCAGTGCTACAGGGACACCCGGGGATTTT	CASSATGTPGDF	TRUE	TRBV6-2*01	TRBD1*01	TRBJ1-5*01
1	TAGCAGTGGTATCAACGCAGAGTACATGGGGATTTT	*QWYQRRVHGDF	FALSE	TRBV20-1*02	NA	TRBJ1-5*01
1	TGTAGCAATCAGCCCCAGCATTTT	CSNQPQHF	TRUE	TRBV15*01	NA	TRBJ1-5*01
1	TGTAGCAACCAGCCCCAGCATTTT	CSNQPQHF	TRUE	TRBV15*01	NA	TRBJ1-5*01

## Sheet: 3 SFW IPS FVS
cloneCount	targetSequences	aaSeqCDR3	productiveTCR	V_gene	D_gene	J_gene
1175825	TGTGCCAGCAGTTTAGCGCTTGATGAGCAGTTCTTC	CASSLALDEQFF	TRUE	TRBV12-3*01	NA	TRBJ2-1*01
949329	TGTGCTGGGAACCAGGGAGGAAAGCTTATCTTC	CAGNQGGKLIF	TRUE	TRAV21*02	NA	TRAJ23*01
39553	TGTGCTGGGCAGTGAGGGAATTATGGAGGAAGCCAAGGAAATCTCATCTTT	CAGQ*GNYGGSQGNLIF	FALSE	TRAV35*01	NA	TRAJ42*01
2528	TGCTGGGAACCAGGGAGGAAAGCTTATCTTC	CWEPG_GKLIF	FALSE	TRAV21*02	NA	TRAJ23*01
438	TGTGCCGCGTCTCGGGGCTGTGAGCCAAAAACATTCAGTACTTC	CAASRGC_AKNIQYF	FALSE	TRBV3-2*03	TRBD2*01	TRBJ2-4*01
283	TGTGCAGGGCAGGCTTTCAGAAACTTGTATTT	CAGQA_QKLVF	FALSE	TRAV25*01	NA	TRAJ8*01
124	TGTGCTGTGAGATTCATACTCACGGGAGGAGGAAACAAACTCACCTTT	CAVRFILTGGGNKLTF	TRUE	TRAV1-2*01	NA	TRAJ10*01
89	TGTGCTGAGAGGCGCTGCTGGGCGTCTGGGCGGAGGACTCCTGGTTCTGGGTGCTGGGAGAGCGATGGGGCTCTCAGCGGTGGGAAGGACCCGAGCTGAGTCTGGGACAGCAGAGCGGGCAGCACCGGTTTTTGTCCTGGGCCTCCAGGCTGTGAGCACAGATACGCAGTATTTT	CAERRCWASGRRTPGSGCWESDGALSGGK_TRAESGTAERAAPVFVLGLQAVSTDTQYF	FALSE	TRBV7-9*04	TRBD1*01	TRBJ2-3*01
	50 reads threshold
47	TGTGCCAGCAGCGAGGGGAAAGAGCCCGGGGAGCTGTTTTTT	CASSEGKEPGELFF	TRUE	TRBV4-2*01	TRBD1*01	TRBJ2-2*01
38	TGTGCTGAGAGGCGCTGCTGGGC	CAER_LLG	FALSE	TRBV6-6*05	NA	TRBJ2-2P*01
32	TGTGTGGTGACAGGTGACAGCTGGGGGAAATTGCAGTTT	CVVTGDSWGKLQF	TRUE	TRAV12-1*01	NA	TRAJ24*02
31	TGTGCTGAGAGGCGCTGCTGGGCGTCTGGGCGGAGGACTCCTGGTTCTGGGTGCTGGGAGAGCGATGGGGCTCTCAGCGGTGGGAAGGACCCGAGCTGAGTCTGGGACAGCAGAGCGGGCAGCACCGGTTTTTGTCCTGGGCCTCCAGGCTGTGAGCACAGATACGCAGTATTTT	CAERRCWASGRRTPGSGCWESDGALSGGK_TRAESGTAERAAPVFVLGLQAVSTDTQYF	FALSE	TRBV7-6*02	TRBD1*01	TRBJ2-3*01
31	TGCCTCGTGGGCGTTTGGATGACAAGATCATCTTT	CLVGVW_DKIIF	FALSE	TRAV4*01	NA	TRAJ30*01
21	TGCGCCAGCAGCCCGGATCGGGGGGCCGACTATGGCTACACCTTC	CASSPDRGADYGYTF	TRUE	TRBV5-1*01	TRBD2*01	TRBJ1-2*01
19	TGTGCCTGGAGTTCGATCTCTGCCGGCAGCTACTACGAGCAGTACTTC	CAWSSISAGSYYEQYF	TRUE	TRBV30*01	NA	TRBJ2-7*01
19	TGTGCTGTCAAAGGAAACAATGACATGCGCTTT	CAVKGNNDMRF	TRUE	TRAV41*01	NA	TRAJ43*01
12	TGCGCCAGGGTCCCCAGGGCTGTGCGAACACCGGGGAGCTGTTTTTT	CARVPRAV_NTGELFF	FALSE	TRBV5-1*01	TRBD1*01	TRBJ2-2*01
11	TGTGCAATGAGAGGGGCCAACACCAATGCAGGCAAATCAACCTTT	CAMRGANTNAGKSTF	TRUE	TRAV14/DV4*01	NA	TRAJ27*01
8	TGTGCTCGAGGGGATGCAGGCAACATGCTCACCTTT	CARGDAGNMLTF	TRUE	TRAV8-3*01	NA	TRAJ39*01
6	TGTGCCAGCAGTGCCACATTGGGGGCAGGTAACTACGAGCAGTACTTC	CASSATLGAGNYEQYF	TRUE	TRBV2*01	TRBD1*01	TRBJ2-7*01
6	TGTGCTCCCCGGGGTGGAGGAAAGCTTATCTTC	CAPRGGGKLIF	TRUE	TRAV2*01	NA	TRAJ23*01
5	TGTGCCGTTATGGATAGCAGCTATAAATTGATCTTC	CAVMDSSYKLIF	TRUE	TRAV12-2*01	NA	TRAJ12*01
4	TGTGCTCTTGGGGAACTAGAGAATTATGGAGGAAGCCAAGGAAATCTCATCTTT	CALGELENYGGSQGNLIF	TRUE	TRDV1*01	TRDD2*01	TRDJ1*01
4	TGTGCTGTGGGGGGGGTTATGACCGACAAGCTCATCTTT	CAVGGVMTDKLIF	TRUE	TRAV22*01	NA	TRAJ34*01
3	TGTGCCAGCAGTTTATGGACGGATCACCGTAGTGGCTACACCTTC	CASSLWTDHRSGYTF	TRUE	TRBV27*01	NA	TRBJ1-2*01
3	TGTGCCAGCTCACCGGGACTCGGGGTCGACGAGCAGTACTTC	CASSPGLGVDEQYF	TRUE	TRBV18*01	TRBD2*01	TRBJ2-7*01
2	TGTGCCAGCAGCTTAGAGATGAGTATGGAGGAAAAACTGTTTTTT	CASSLEMSMEEKLFF	TRUE	TRBV7-9*01	NA	TRBJ1-4*01
2	TGTGCTCTTGGGGAACTAACTGAAAGCCAAGGAAATCTCATCTTT	CALGELTESQGNLIF	TRUE	TRDV1*01	NA	TRDJ1*01
2	TGTGCCCCAACGACCTAAGGGGTGGCTACAATAAGCTGATTTTT	CAPTT*G_GYNKLIF	FALSE	TRAV6*01	NA	TRAJ4*01
2	TTTTTTTTTTTTTTTTTTTTTTTTT	FFFF_FFFF	FALSE	TRBV16*01	NA	TRBJ2-2*01
2	TGTGCCAGCAGCTTGAGCAGGACCGTAGAGGGTAGGACAATGAGCAGTTCTTC	CASSLSRTV_G*DNEQFF	FALSE	TRBV7-9*03	TRBD2*02	TRBJ2-1*01
2	TGTGCCAGCAGCTTAGATCCCGCTGGGCAAGGTTGGGAGCAGTACTTC	CASSLDPAGQGWEQYF	TRUE	TRBV11-2*03	TRBD2*01	TRBJ2-7*01
2	TGTGCCAGCAGTCCGTCGTCCGCCCCTAATGAAAAACTGTTTTTT	CASSPSSAPNEKLFF	TRUE	TRBV28*01	TRBD1*01	TRBJ1-4*01
2	TGTGCCAGCAGCGAGGGGAAAGAGCCCGGGGAGCTGTTTTTTT	CASSEGK_SPGSCFF	FALSE	TRBV4-2*01	TRBD1*01	TRBJ2-2*01
2	TGTGCCAGCAGCTTAGGGGGGACAGGGTCTGAAGCTTTCTTT	CASSLGGTGSEAFF	TRUE	TRBV7-9*01	TRBD1*01	TRBJ1-1*01
2	TGTGCCAGCAGTTTAGCTCTAGACGAGCAGTACTTC	CASSLALDEQYF	TRUE	TRBV12-3*01	NA	TRBJ2-7*01
1	TGTGCAGAGTCCTGAGGTCTGGGGCTGGGAGTTACCAACTCACTTTC	CAES*GLG_GSYQLTF	FALSE	TRAV5*01	NA	TRAJ28*01
1	TGTGTGGTGACAGGCGACAGCTGGGGGAAATTGCAGTTT	CVVTGDSWGKLQF	TRUE	TRAV12-1*01	NA	TRAJ24*02
1	TGTGCCAGCAGCTTAGGCCCTGGACGGACTAGCTCCTACGAGCAGTACTTC	CASSLGPGRTSSYEQYF	TRUE	TRBV7-9*01	TRBD1*01	TRBJ2-7*01
1	TGTGCCAGCGGGACTAGCGGGAGTTGGTCAGATACGCAGTATTTT	CASGTSGSWSDTQYF	TRUE	TRBV27*01	TRBD2*02	TRBJ2-3*01
1	TGTGCCAGCAGTGAAGAGGAAACAGGGGGTTCACCCCTCCACTTT	CASSEEETGGSPLHF	TRUE	TRBV2*01	TRBD1*01	TRBJ1-6*01
1	TGTGCCAGCAGCTTAGGAGAACTGGTACAAGAGACCCAGTACTTC	CASSLGELVQETQYF	TRUE	TRBV7-9*01	NA	TRBJ2-5*01
1	TGTGCCAGCAATAGTGCAGGACTGGGAACCGGGGAGCTGTTTTTT	CASNSAGLGTGELFF	TRUE	TRBV2*02	NA	TRBJ2-2*01
1	TGTGCCACCAGCGGCGACACGGAAGGCCGAGTAGAGGACTTC	CATSGDTEGRVEDF	TRUE	TRBV15*02	TRBD2*02	TRBJ2-7*01
1	TGTGCAGAGATCTTTTCTGGTGGCTACAATAAGCTGATTTTT	CAEIFSGGYNKLIF	TRUE	TRAV5*01	NA	TRAJ4*01
1	TGTGCCAGGGGGGTGAGGAGGGGAGAGACCCAGTACTTC	CARGVRRGETQYF	TRUE	TRBV11-3*01	TRBD2*02	TRBJ2-5*01
1	TGCGCCAGCGGACAGGGGGGCACAGATACGCAGTATTTT	CASGQGGTDTQYF	TRUE	TRBV4-1*01	TRBD1*01	TRBJ2-3*01
1	TGCAGCGTTAAGGGGCAATCCGGGACATCGAGTCTTTTT	CSVKGQSGTSSLF	TRUE	TRBV29-1*01	TRBD1*01	TRBJ1-4*01
1	TGTGCCTTCGCCTCAGGAACCTACAAATACATCTTT	CAFASGTYKYIF	TRUE	TRAV12-2*01	NA	TRAJ40*01
1	TGTGCCAGCTCGGGGGACTCCTACGAGCAGTACTTC	CASSGDSYEQYF	TRUE	TRBV7-2*01	NA	TRBJ2-7*01
1	TGTGCAGAGGTCTCAGGAACCTACAAATACATCTTT	CAEVSGTYKYIF	TRUE	TRAV5*01	NA	TRAJ40*01
1	CCTCATGGCTCTAGCAACACAGGCAAACTAATCTTT	PHGSSNTGKLIF	TRUE	TRAV27*01	NA	TRAJ37*02
1	TGTGCTGTGAAAGGAAACAATGACATGCGCTTT	CAVKGNNDMRF	TRUE	TRAV41*01	NA	TRAJ43*01
1	TGTGCTGGCCCCCCCCCAGGAAAGCTTATCTTC	CAGPPPGKLIF	TRUE	TRAV21*01	NA	TRAJ23*01
1	TGTGCCGTGAACGGAGATGACAAGATCATCTTT	CAVNGDDKIIF	TRUE	TRAV12-2*01	NA	TRAJ30*01
1	TGTGCCGTGACTCCTGCCAGACTCATGATT	CAVTPARLMI	TRUE	TRAV12-2*01	NA	TRAJ31*01

## Sheet: 4 JZX IPS FVS
cloneCount	targetSequences	aaSeqCDR3	productiveTCR	V_gene	D_gene	J_gene
1105247	TGTGCTGGGAACCAGGGAGGAAAGCTTATCTTC	CAGNQGGKLIF	TRUE	TRAV21*02	NA	TRAJ23*01
825928	TGTGCCAGCAGTTTAGCGCTCGATGAGCAGTTCTTC	CASSLALDEQFF	TRUE	TRBV12-3*01	NA	TRBJ2-1*01
201068	TGTGCCAGCAGTTTAGCGCTAGATGAGCAGTTCTTC	CASSLALDEQFF	TRUE	TRBV12-3*01	NA	TRBJ2-1*01
172793	TGTGCAGGGCAGGCTTTCAGAAACTTGTATTT	CAGQA_QKLVF	FALSE	TRAV25*01	NA	TRAJ8*01
51344	TGTGCTGTGAGATTCATACTCACGGGAGGAGGAAACAAACTCACCTTT	CAVRFILTGGGNKLTF	TRUE	TRAV1-2*01	NA	TRAJ10*01
30730	TGTGCCAGCTCACCGGGACTCGGGGTCGACGAGCAGTACTTC	CASSPGLGVDEQYF	TRUE	TRBV18*01	TRBD2*01	TRBJ2-7*01
30522	TGTGCCAGCAGCTTAGGCCCTGGACGGACTAGCTCCTACGAGCAGTACTTC	CASSLGPGRTSSYEQYF	TRUE	TRBV7-9*03	TRBD1*01	TRBJ2-7*01
27900	TGCGCCAGCAGCTCGCAGGGGGATGCGACTAATGAAAAACTGTTTTTT	CASSSQGDATNEKLFF	TRUE	TRBV5-1*01	TRBD1*01	TRBJ1-4*01
24492	TGTGCCACCAGCGGCGACACGGAAGGCCGAGTAGAGGACTTC	CATSGDTEGRVEDF	TRUE	TRBV15*02	TRBD2*02	TRBJ2-7*01
24282	TGTGCCAGCAGCTTAGGAGAACTGGTACAAGAGACCCAGTACTTC	CASSLGELVQETQYF	TRUE	TRBV7-9*03	NA	TRBJ2-5*01
13632	TGTGCCAGCAGTTTAGCGTCAGGTGAAAAACTGTTTTTT	CASSLASGEKLFF	TRUE	TRBV12-3*01	NA	TRBJ1-4*01
9305	TGTGTGGTGACAGGTGACAGCTGGGGGAAATTGCAGTTT	CVVTGDSWGKLQF	TRUE	TRAV12-1*01	NA	TRAJ24*02
5090	TGTGCTGTCAAAGGAAACAATGACATGCGCTTT	CAVKGNNDMRF	TRUE	TRAV41*01	NA	TRAJ43*01
4631	TGTGCCAGGGGGGTGAGGAGGGGAGAGACCCAGTACTTC	CARGVRRGETQYF	TRUE	TRBV11-3*01	TRBD2*02	TRBJ2-5*01
1689	TGTGCCAGGGGGGTGAGGAGGGGAGAGACCCAGTACTTC	CARGVRRGETQYF	TRUE	TRBV11-3*02	TRBD2*02	TRBJ2-5*01
1498	TGTGCCAGTAGTCTTACAGGTAATACTGAAGCTTTCTTT	CASSLTGNTEAFF	TRUE	TRBV19*01	TRBD1*01	TRBJ1-1*01
406	TGTGCAGAGATCTTTTCTGGTGGCTACAATAAGCTGATTTTT	CAEIFSGGYNKLIF	TRUE	TRAV5*01	NA	TRAJ4*01
367	TGTGCCAGCAGCCAAGAAGTGGGAGCGGGTGACAATGAGCAGTTCTTC	CASSQEVGAGDNEQFF	TRUE	TRBV14*01	TRBD2*01	TRBJ2-1*01
257	TGTGCCAGCTCACCGGGACTCGGGGTCGATGAGCAGTTCTTC	CASSPGLGVDEQFF	TRUE	TRBV18*01	TRBD2*01	TRBJ2-1*01
113	TGTGCCAGCAGGACAGGGTCTACGGATGAAAAACTGTTTTTT	CASRTGSTDEKLFF	TRUE	TRBV6-1*01	TRBD1*01	TRBJ1-4*01
	50 reads threshold
47	TGCGCCAGCAGCCAACTCGGGACGGGTAGCTCCTACGAGCAGTACTTC	CASSQLGTGSSYEQYF	TRUE	TRBV4-1*01	TRBD1*01	TRBJ2-7*01
26	TGTGCTCTCCGAGGGGAAAGCTTATCTTC	CALRG_KLIF	FALSE	TRAV6*01	NA	TRAJ23*01
21	TGTGCAATGAGAGAGGTTAACACCAATGCAGGCAAATCAACCTTT	CAMREVNTNAGKSTF	TRUE	TRAV14/DV4*01	NA	TRAJ27*01
20	TGTGCTTATAGGACCTTTATATCTAACTTTGGAAATGAGAAATTAACCTTT	CAYRTFISNFGNEKLTF	TRUE	TRAV38-2/DV8*01	NA	TRAJ48*01
9	TGTGCTCTTCCGATCTAAGCAGTGGTATCAACGCAGAGTACATGGGGAGGAGGAAGCTACATACCTACATTT	CALPI*AVVSTQSTWGGGSYIPTF	FALSE	TRAV16*01	NA	TRAJ6*01
9	TGCGCCAGCAGCTTGTGGGGGACGGGGGGCTACGAGCAGTACTTC	CASSLWGTGGYEQYF	TRUE	TRBV5-1*01	TRBD1*01	TRBJ2-7*01
6	TGTGCCAGCTCACCGGGACTCAGCTGTGTACTTCTGTGCCAGCAGTTTAGCGCTCGATGAGCAGTTCTTC	CASSPGLSCVLL_ASSLALDEQFF	FALSE	TRBV18*01	TRBD2*01	TRBJ2-1*01
4	TGTGCTGTGAGGCCTGATAACCAGGGAGGAAAGCTTATCTTC	CAVRPDNQGGKLIF	TRUE	TRAV21*01	NA	TRAJ23*01
3	TGTGCCAGCAGTTTAGCGCTCGATGTGGTGTTCTTC	CASSLALDVVFF	TRUE	TRBV12-3*01	NA	TRBJ2-1*01
3	TAGCAGTGGTATCAACGCAGAGTACATGGG	*QWYQRRVHG	FALSE	TRBV20-1*02	NA	TRBJ2-7*01
2	TAGCAGTGGTATCAACGCAGAGTACATGGG	*QWYQRRVHG	FALSE	TRBV20/OR9-2*02	NA	TRBJ2-7*01
2	TGTGCCAGCAGTTTAGCGCCCACGAGCAGTACTTC	CASSLA_HEQYF	FALSE	TRBV12-3*01	NA	TRBJ2-7*01
1	TGTGCCAGCTCACCGGGACTCGGCCGTGTATCTCTGTGCCAGGGGGGTGAGGAGGGGAGAGACCCAGTACTTC	CASSPGLGRVSL_ARGVRRGETQYF	FALSE	TRBV18*01	TRBD1*01	TRBJ2-5*01
1	GGGCCAGGCACGCGGCTCCTGGTGCTCGGTGAGCGCGGGCTGCTGGGGCGCGGGCGCGGGCGGCTTGGGTCTGGTTTTTGCGGGGAGTCCCCGGGCTGTGCTCTGGGGCCAACGTCCTGACTTTC	GPGTRLLVLGERGLLGRGRGR_WVWFLRGVPGLCSGANVLTF	FALSE	TRBV13*02	TRBD2*01	TRBJ2-6*01
1	TGTGCCAGCTCACCGGGACTCGGCTGTGTACTTCTGTGCCAGCAGTTTAGCGCTCGATGAGCAGTTCTTC	CASSPGLGCVLL_ASSLALDEQFF	FALSE	TRBV18*01	TRBD2*01	TRBJ2-1*01
1	TGTGCCAGCTCACCGGGACTCAGCTGTGTACTTCTGTGCCAGCAGTTTAGCGCTAGATGAGCAGTTCTTC	CASSPGLSCVLL_ASSLALDEQFF	FALSE	TRBV18*01	TRBD2*01	TRBJ2-1*01
1	TGTGCTGTGAGATTCATACTCACGGGAGGAGGAAGCTACATACCTACATTT	CAVRFILTGGGSYIPTF	TRUE	TRAV1-2*01	NA	TRAJ6*01
1	TGTGCTGTGAGATTCATACTCACGGGAGGAGGATTGTAACTCACCTTT	CAVRFILTGGGL*LTF	FALSE	TRAV1-2*01	NA	TRAJ10*01
1	TGTGCAGAGGGAGGGTTAGGATGCAGGCAACATGCTCACCTTT	CAEGGLG_AGNMLTF	FALSE	TRAV5*01	NA	TRAJ39*01
1	TAGCAGTGGTATCAACGCAGAGTACATGGGGAGTACTTC	*QWYQRRVHGEYF	FALSE	TRBV20-1*02	NA	TRBJ2-7*01
1	TAGCAGTGGTATCAACGCAGAGTACATGGGAGTACTTC	*QWYQR_STWEYF	FALSE	TRBV20-1*02	NA	TRBJ2-7*01
1	TGCAGTGGTATCAACGCAGAGTACATGGG	CSGIN_RVHG	FALSE	TRBV20/OR9-2*02	NA	TRBJ2-7*01

## Sheet: 5 UTT IPS
cloneCount	targetSequences	aaSeqCDR3	productiveTCR	V_gene	D_gene	J_gene
299310	TGTGCCAGCAGTGCTACAGGGGTTGAAGCTTTCTTT	CASSATGVEAFF	TRUE	TRBV6-3*01	TRBD1*01	TRBJ1-1*01
220191	TGTGCCAGCAGTTTAGCGCTGGATGAGCAGTTCTTC	CASSLALDEQFF	TRUE	TRBV12-3*01	NA	TRBJ2-1*01
194617	TGTGCTGGGAACCAGGGAGGAAAGCTTATCTTC	CAGNQGGKLIF	TRUE	TRAV21*02	NA	TRAJ23*01
94257	TGCATCGTCACGATCGGGGCTCTGGCAACACAGGCAAACTAATCTTT	CIVTIGAL_NTGKLIF	FALSE	TRAV26-1*02	NA	TRAJ37*01
67765	TGTGCCAGCAGCTTAAGCCTAGCGGGATCTACAGATACGCAGTATTTT	CASSLSLAGSTDTQYF	TRUE	TRBV7-3*01	TRBD2*02	TRBJ2-3*01
34142	TGTGCCAGCAGCTCGGGACAGCTCAGGCCGCCTCGAGACCCAGTACTTC	CASSSGQL_GRLETQYF	FALSE	TRBV5-4*01	TRBD1*01	TRBJ2-5*01
17272	TGCGCCAGCAGCCCCCGGGACAGGGACTTTTACGGGGAGCTGTTTTTT	CASSPRDRDFYGELFF	TRUE	TRBV4-3*01	TRBD1*01	TRBJ2-2*01
4386	TGTGCCAGCACCCCCAGGGAGCGGGAGAACACCTACGAGCAGTACTTC	CASTPRERENTYEQYF	TRUE	TRBV6-5*01	TRBD2*02	TRBJ2-7*01
3227	TGTGTGGTGTCGACGGAGGGGAATATGGAAACAAACTGGTCTTT	CVVSTEG_YGNKLVF	FALSE	TRAV12-1*01	NA	TRAJ47*01
3078	TGTGCCAGCAGTGACGGGGCGGGAGACAATGAGCAGTTCTTC	CASSDGAGDNEQFF	TRUE	TRBV6-4*01	TRBD2*02	TRBJ2-1*01
2660	TGCAGTGCTAGTTTGGGAGGGGGCGAGCAGTACTTC	CSASLGGGEQYF	TRUE	TRBV20-1*04	TRBD2*02	TRBJ2-7*01
2407	TGTGCCAGCAGTTACCCAGAGGGGACTAGCGGGGGGGTTCTGCACAGATACGCAGTATTTT	CASSYPEGTS_GGFCTDTQYF	FALSE	TRBV6-8*01	TRBD2*01	TRBJ2-3*01
1711	TGTGCTGTGGAAGGGTGGGGAAGCCAAGGAAATCTCATCTTT	CAVEGWGSQGNLIF	TRUE	TRAV22*01	NA	TRAJ42*01
1667	TGTGCCAGCAGCTTAGATTTGGGCTCCACTGAAGCTTTCTTT	CASSLDLGSTEAFF	TRUE	TRBV11-3*01	NA	TRBJ1-1*01
1441	TGTGCCAGCAGCCTAACAGGGGTAGAAGCTTTCTTT	CASSLTGVEAFF	TRUE	TRBV6-2*01	TRBD1*01	TRBJ1-1*01
1247	TGTGCCACGTCAGACAGGACAGGCCAGTACGAGCAGTACTTC	CATSDRTGQYEQYF	TRUE	TRBV15*02	TRBD1*01	TRBJ2-7*01
1073	TGTGCTCTAATCCCCATAACAATGCCAGACTCATGTTT	CALIPI_NARLMF	FALSE	TRAV16*01	NA	TRAJ31*01
850	TGTGCTGAGAGGCGCTGCTGGGCGTCTGGGCGGAGGACTCCTGGTTCTGGGTGCTGGGAGAGCGATGGGGCTCTCAGCGGTGGGAAGGACCCGAGCTGAGTCTGGGACAGCAGAGCGGGCAGCACCGGTTTTTGTCCTGGGCCTCCAGGCTGTGAGCACAGATACGCAGTATTTT	CAERRCWASGRRTPGSGCWESDGALSGGK_TRAESGTAERAAPVFVLGLQAVSTDTQYF	FALSE	TRBV7-6*02	TRBD1*01	TRBJ2-3*01
656	TGTGCCGTGGACGGCGGATCTGAAAAGCTGGTCTTT	CAVDGGSEKLVF	TRUE	TRAV12-2*02	NA	TRAJ57*01
588	TGTGCCAGCAGCCCAACAGGGGTCTTCGACGAGCAGTACTTC	CASSPTGVFDEQYF	TRUE	TRBV7-2*02	TRBD1*01	TRBJ2-7*01
583	TGTGCCAGCAGCCTAACAGGGGTAGAAGCTTTCTTT	CASSLTGVEAFF	TRUE	TRBV6-3*01	TRBD1*01	TRBJ1-1*01
578	TGCGCCAGCAGCCAAGATCGGGGCGTAGGCCAGAACACCGGGGAGCTGTTTTTT	CASSQDRGVGQNTGELFF	TRUE	TRBV4-3*01	TRBD1*01	TRBJ2-2*01
553	TGTGCCGTCAAGGATTCTGGGGGTTACCAGAAAGTTACCTTT	CAVKDSGGYQKVTF	TRUE	TRAV12-2*02	NA	TRAJ13*01
548	TGCATCGTCACGATCGGGGCTCTGGCAACACAGGCAAACTAATCTTTGGGCAAGGGACAACTTTACAAGTAAAACCAGAGGCCTGAGTCAAGGTTATTGCAATAGCACTAAAGACTGTGTAACACCAATGCAGGCAAATCAACCTTT	CIVTIGALATQAN*SLGKGQLYK*NQRPESRLLQ*H*RLCNTNAGKSTF	FALSE	TRAV26-1*01	NA	TRAJ27*01
507	TGTGCAGAGGCGGCCAGGGTAACAATGCCAGACTCATGTTT	CAEAARV_NARLMF	FALSE	TRAV13-2*01	NA	TRAJ31*01
499	TGTGCCAGCAGTCTGGCCCTCGACGAGCAGTACTTC	CASSLALDEQYF	TRUE	TRBV12-3*01	TRBD2*02	TRBJ2-7*01
476	TGTGCTCTGAGTGAGTACGAACGTATTCAGGAGGAGGTGCTGACGGACTCACCTTT	CALSEYERI_GGGADGLTF	FALSE	TRAV19*01	NA	TRAJ45*01
468	TGTGCCGCGTCTCGGGGCTGTGAGCCAAAAACATTCAGTACTTC	CAASRGC_AKNIQYF	FALSE	TRBV3-1*02	TRBD1*01	TRBJ2-4*01
403	TGTGCTGTGGAAGGCTATGGTCAGAATTTTGTCTTT	CAVEGYGQNFVF	TRUE	TRAV22*01	NA	TRAJ26*01
397	TGTGCCAGCAGCGTAGAGGGGGGTTACTACAATGAGCAGTTCTTC	CASSVEGGYYNEQFF	TRUE	TRBV9*01	TRBD1*01	TRBJ2-1*01
373	TGTGCCAGCAGTGCTACAGGGACACCCGGGGATTTT	CASSATGTPGDF	TRUE	TRBV6-2*01	TRBD1*01	TRBJ1-5*01
364	TGTGTTGTGAGTGGGGCGGACAGCTGGGGGAAATTGCAGTTT	CVVSGADSWGKLQF	TRUE	TRAV8-2*01	NA	TRAJ24*02
345	TGCGCCAGCAGCCAAGACCGAGGGGGTGCAGCGGGCGGCTACACCTTC	CASSQDRGGAAGGYTF	TRUE	TRBV4-3*01	TRBD1*01	TRBJ1-2*01
339	TGCGCCAGCAGCTTGGAGGGACAGGGTAACACTGAAGCTTTCTTT	CASSLEGQGNTEAFF	TRUE	TRBV5-1*01	TRBD1*01	TRBJ1-1*01
309	TGTGCTGTGAAGGCAGGAACTGCTCTGATCTTT	CAVKAGTALIF	TRUE	TRAV21*02	NA	TRAJ15*01
277	TGTGCCAGCAGTGAACAGGGCGCCGGACTAGCGGGGTACGAGCAGTACTTC	CASSEQGAGLAGYEQYF	TRUE	TRBV2*01	TRBD2*01	TRBJ2-7*01
258	TGTGCCAGCAGCTTAGCGGTTTTATCGGGGCAAAATGAAGCTTTCTTT	CASSLAVLSGQNEAFF	TRUE	TRBV7-8*01	TRBD2*01	TRBJ1-1*01
255	TGTGCCAGCAGCCCAGATTTGGGAAGCACTGAAGCTTTCTTT	CASSPDLGSTEAFF	TRUE	TRBV11-3*01	NA	TRBJ1-1*01
231	TGTGCTCTTGGGGAACTACCCGACTACAAGCTCAGCTTT	CALGELPDYKLSF	TRUE	TRDV1*01	NA	TRDJ1*01
226	TGTGCCAGCAGCCAAGGTTGGGGGGAACTACAATGAGCAGTTCTTC	CASSQGWG_NYNEQFF	FALSE	TRBV3-1*01	TRBD2*01	TRBJ2-1*01
220	TGTGCCAGCAGTTTAGCCCTGGACGAACCCCACTTT	CASSLALDEPHF	TRUE	TRBV12-4*01	NA	TRBJ1-6*02
212	TGTGCCAGCAGTCTACTTCTAGCGGGACCCCCCACAGATACGCAGTATTTT	CASSLLLAGPPTDTQYF	TRUE	TRBV6-3*01	TRBD2*02	TRBJ2-3*01
209	TGTGCCAGCAGCCCAACAGGGGTCTTCGACGAGCAGTACTTC	CASSPTGVFDEQYF	TRUE	TRBV7-2*01	TRBD1*01	TRBJ2-7*01
199	TGCCTCGTGGGTGACCCTTGATGGCTCTGGCAACACAGGCAAACTAATCTTT	CLVGDP*WL_GNTGKLIF	FALSE	TRAV4*01	NA	TRAJ37*01
162	TGTGACAATAACAATGACATGCGCTTT	CDNNNDMRF	TRUE	TRAV16*01	NA	TRAJ43*01
158	TGCATCGTCAGAGTCGGGGTGAACACAGGCTTTCAGAAACTTGTATTT	CIVRVGVNTGFQKLVF	TRUE	TRAV26-1*01	NA	TRAJ8*01
156	TGTGCTTCAAAGGCAGGAACTGCTCTGATCTTT	CASKAGTALIF	TRUE	TRAV21*02	NA	TRAJ15*01
152	TGTGCCAGCAGCTTAGAGGGACAGTACTATGAAAAACTGTTTTTT	CASSLEGQYYEKLFF	TRUE	TRBV7-2*02	TRBD1*01	TRBJ1-4*01
144	TGTGCAGTCTCAACCTCAGGAACCTACAAATACATCTTT	CAVSTSGTYKYIF	TRUE	TRAV13-2*01	NA	TRAJ40*01
142	TGTGCTCTTGGGGAACTACCCGACTACAAGCTCATCTTT	CALGELPDYKLIF	TRUE	TRDV1*01	NA	TRDJ1*01
109	TGCGCCAGCAGCCCGACAGGGGAGCCCGGTGAGCAGTACTTC	CASSPTGEPGEQYF	TRUE	TRBV4-3*01	TRBD1*01	TRBJ2-7*01
108	TGTGCCAGCAGTCAGACAGGAACTGAAGCTTTCTTT	CASSQTGTEAFF	TRUE	TRBV6-2*01	TRBD1*01	TRBJ1-1*01
102	TGTGCCAGCAGCCAAGAATGGCGGGAGAGTCCCAATGAGCAGTTCTTC	CASSQEWRESPNEQFF	TRUE	TRBV4-2*01	TRBD2*02	TRBJ2-1*01
102	TGTGCCAGCAGCTTAGACCTCGGGTCGGAAGCAGCTTTCTTT	CASSLDLGSEAAFF	TRUE	TRBV11-3*01	NA	TRBJ1-1*01
97	TGTGCCAGCAGCGTTGACCTTGGGAGCGCTGAAGCTTTCTTT	CASSVDLGSAEAFF	TRUE	TRBV11-3*02	TRBD2*02	TRBJ1-1*01
96	TGTGCTGTGAGCTCCTGGCAGGGGCAGGCAGGAACTGCTCTGATCTTT	CAVSSWQGQAGTALIF	TRUE	TRAV1-2*01	NA	TRAJ15*01
90	TGTGCTTTCCGATGACAAGATCATCTTT	CAFR*_KIIF	FALSE	TRAV38-1*01	NA	TRAJ30*01
88	TGTGCAAGTCGCTCCTCGACAGGGCCCACCTGAAAAACTGTTTTTT	CASRSSTG_PPEKLFF	FALSE	TRBV12-2*01	TRBD2*02	TRBJ1-4*01
86	TGTGCTCTGAGTGATTTTAGAAACCAATGCAGGCAAATCAACCTTT	CALSDFRN_NAGKSTF	FALSE	TRAV9-2*02	NA	TRAJ27*01
84	TGTCCCCTCGAGGGCTGCAGGCAACAAGCTAACTTTT	CPLEGC_GNKLTF	FALSE	TRAV25*01	NA	TRAJ17*01
81	TGTGCCAGCAGTGCTACAGGGGTTGAAGCTTTCTTTGGACAAGGCACCAGACTCACAGTTGTAGGGTTAAAATTCTACTAAGGAACAGGAGAGGACCTGGCAGGTGGACTTGGGGAGGCAGGAGTGGAAGGCAGCAGGTCGCGGTTTTCCTTCCAGTCTTTAATGTTGTGCAACTAATGAAAAACTGTTTTTT	CASSATGVEAFFGQGTRLTVVGLKFY*GTGED_WQVDLGRQEWKAAGRGFPSSL*CCATNEKLFF	FALSE	TRBV6-4*01	TRBD2*02	TRBJ1-4*01
80	TGTGCCAGCAGCGCCCGATCGGGACAGCGGGTTCACCCCTCCACTTT	CASSARSG_AGSPLHF	FALSE	TRBV9*03	TRBD2*01	TRBJ1-6*02
79	TGTGCCAGCAGTCTACTTCTAGCGGGACCCCCCACAGATACGCAGTATTTT	CASSLLLAGPPTDTQYF	TRUE	TRBV6-2*01	TRBD2*02	TRBJ2-3*01
74	TGTGCCAGCAGTTACCACAGCCAAGAAGCTTTCTTT	CASSYHSQEAFF	TRUE	TRBV6-2*01	NA	TRBJ1-1*01
70	TGTGCCAGCAGTGAGACAGGGGGTCCAGCTTTCTTT	CASSETGGPAFF	TRUE	TRBV6-2*01	TRBD1*01	TRBJ1-1*01
69	TGCATCGTCACGATCGGGGCTCTGGCAACACAGGCAAACTAATCTTTGGGCAAGGGACAACTTTACAAGTAAAACCAGAGCACATCAAGAAGAGGGGTGAAGTGACAAAAGGGAGTTTATTGTGAGGCATCAAACACTGTGATACTCACGGGAGGAGGAAACAAACTCACCTTT	CIVTIGALATQAN*SLGKGQLYK*NQSTSRRGVK*QKGVYCEASNTVILTGGGNKLTF	FALSE	TRAV26-1*01	NA	TRAJ10*01
67	TGTGCAGGCCCCTCTGGGGCTGGGAGTTACCAACTCACTTTC	CAGPSGAGSYQLTF	TRUE	TRAV13-2*01	NA	TRAJ28*01
66	TGTGCTCCCCGGGCAGGAACTGCTCTGATCTTT	CAPRAGTALIF	TRUE	TRAV21*02	NA	TRAJ15*01
66	TGTGCCGTGGACCCGAATAGTGGAGGTAGCAACTATAAACTGACATTT	CAVDPNSGGSNYKLTF	TRUE	TRAV39*01	NA	TRAJ53*01
61	TGTGCAGCGCAAATCGGAGGAAGCTACATACCTACATTT	CAAQIGGSYIPTF	TRUE	TRAV29/DV5*01	NA	TRAJ6*01
60	TGTGCCAGCAGTTTATCCTCTTTTCCGGGTGTGTCTGACACCGGGGAGCTGTTTTTT	CASSLSSFPGVSDTGELFF	TRUE	TRBV27*01	TRBD1*01	TRBJ2-2*01
55	TGTGTGGTGTCCGGGGCCTTCTTCTGGTTCTGCAAGGCAACTGACCTTT	CVVSGAFF_GSARQLTF	FALSE	TRAV12-1*01	NA	TRAJ22*01
54	TGTGCCAGCAGCTCGGGACAGCTCAGGCCGCCTCGAGACCCAGTACTTCGGGCCAGGCACGCGGCTCCTGGTGCTCGGTGAGCGCGGGCTGCTGGGGCGCGGGCGCGGGCGGCTTGGGTCTGGTTTTTGCGGGGAGTCCCCGGGCTGTGCTCTGGGGCCAACGTCCTGACTTTC	CASSSGQLRPPRDPVLRARHAAPGAR*ARAAGARARAAWVWFLRGVPGLCSGANVLTF	FALSE	TRBV5-4*01	TRBD2*01	TRBJ2-6*01
50	TGCGCCAGCAGCCCGCAGGGTGCAGGCCCTTTAGACGAGCAGTACTTC	CASSPQGAGPLDEQYF	TRUE	TRBV5-1*01	TRBD2*02	TRBJ2-7*01
45	TGTGTATGGGAACCGGGACTAATCCTACAATGAGCAGTTCTTC	CVWEPGL_SYNEQFF	FALSE	TRBV6-1*01	TRBD2*01	TRBJ2-1*01
	50 reads threshold
44	TGTGCCAGCAGTCAAACAGGGTCGGAAGCTTTCTTT	CASSQTGSEAFF	TRUE	TRBV6-2*01	TRBD1*01	TRBJ1-1*01
43	TGTGCCAGCAGTTACTCGAGTTTAAGTCCGGACTACGAGCAGTACTTC	CASSYSSLSPDYEQYF	TRUE	TRBV6-5*01	TRBD2*01	TRBJ2-7*01
42	TGTGCTGAGAGGCGCTGCTGGGC	CAER_LLG	FALSE	TRBV6-6*05	NA	TRBJ2-2P*01
42	TGCAGCGTTGAGGAAGGGGAACTCTACGAGCAGTACTTC	CSVEEGELYEQYF	TRUE	TRBV29-1*01	NA	TRBJ2-7*01
38	TGTGCAATGAGTCGCGGATCTGAAAAGCTGGTCTTT	CAMSRGSEKLVF	TRUE	TRAV12-3*01	NA	TRAJ57*01
37	TGTGCAGCTGGGTGAGAAATTAACCTTT	CAAG*_KLTF	FALSE	TRAV13-1*01	NA	TRAJ48*01
36	TGTGCCAGCAGTTACCCAGAGGGGACTAGCGGGGGGGTTCTGCAGATACGCAGTATTTT	CASSYPEGTS_GGSADTQYF	FALSE	TRBV6-8*01	TRBD2*01	TRBJ2-3*01
34	TGTGCCATCAGTGCGGACCCGGGAACCTATGGCTACACCTTC	CAISADPGTYGYTF	TRUE	TRBV10-3*01	TRBD1*01	TRBJ1-2*01
34	TGTGCCAGCAGTTTATCGGGGGGCCCTAATGAAAAACTGTTTTTT	CASSLSGGPNEKLFF	TRUE	TRBV28*01	TRBD2*01	TRBJ1-4*01
33	TGTGCTGTGAGGTCGGGGGCCAGACTCATGTTT	CAVRSGARLMF	TRUE	TRAV21*02	NA	TRAJ31*01
33	TGTGCCAGCAGCTTAGAACAGGGACAGGGCGGCTACACCTTC	CASSLEQGQGGYTF	TRUE	TRBV11-2*01	TRBD1*01	TRBJ1-2*01
33	TGTGCTACGGCCTCCTTATAACACCGACAAGCTCATCTTT	CATASL*_TDKLIF	FALSE	TRAV17*01	NA	TRAJ34*01
32	TGTGCCAGCAGTTTAGCGCTAGACGAGCAGTACTTC	CASSLALDEQYF	TRUE	TRBV12-3*01	NA	TRBJ2-7*01
31	TGTGCCAGCAGTGCAAGCGGGAATCCCTACGAGCAGTACTTC	CASSASGNPYEQYF	TRUE	TRBV6-1*01	NA	TRBJ2-7*01
26	TGTGCTCTTGGGGACCCCTTCGGAGGCCAGAAAGTTACCTTTGGAATTGGAACAAAGCTCCAAGTCATCCCAAATCATGGGTTGAAATACCTAACACTGCAAATCATTTTTGTATGGGGATTTGCTATAGTGTGAATTCAGGATACAGCACCCTCACCTTT	CALGDPFGGQKVTFGIGTKLQVIPNHG_EIPNTANHFCMGICYSVNSGYSTLTF	FALSE	TRAV8-4*02	NA	TRAJ11*01
26	TGTGCCGTGTTTATATCTAACTTTGGAAATGAGAAATTAACCTTT	CAVFISNFGNEKLTF	TRUE	TRAV12-2*01	NA	TRAJ48*01
26	TGTGCCAGCAGCGTAGAGGGGGGCTACTACAATGAGCAGTTCTTC	CASSVEGGYYNEQFF	TRUE	TRBV9*01	NA	TRBJ2-1*01
25	TGTGCTGTCAAGGCAGGAACTGCTCTGATCTTT	CAVKAGTALIF	TRUE	TRAV21*02	NA	TRAJ15*01
25	TGCGCCAGCAGCCCCCGGGACAGCTCAGGCCGCCTCGAGACCCAGTACTTC	CASSPRDSSGRLETQYF	TRUE	TRBV4-3*01	TRBD1*01	TRBJ2-5*01
25	TGTGCAATGACCTTTAACGACTACAAGCTCAGCTTT	CAMTFNDYKLSF	TRUE	TRAV12-3*01	NA	TRAJ20*01
25	TGCAGTGCCTACGCCGCACAGGGCGCTGAAGCTTTCTTT	CSAYAAQGAEAFF	TRUE	TRBV20-1*02	TRBD1*01	TRBJ1-1*01
24	TGTGCTGTCACTTTAACACCAATGCAGGCAAATCAACCTTT	CAVTLTP_AGKSTF	FALSE	TRAV3*01	NA	TRAJ27*01
24	TGCGCCAGCAGCCCCCGGGACAGGGATTACGGGGAGCTGTTTTTT	CASSPRDRDYGELFF	TRUE	TRBV4-3*01	TRBD1*01	TRBJ2-2*01
22	TGTGCTACGGAAGATAGCAACTATCAGTTAATCTGG	CATEDSNYQLIW	TRUE	TRAV17*01	NA	TRAJ33*01
22	TGTGCCAGCAGCCAAGCCCTAGACGAGCAGTACTTC	CASSQALDEQYF	TRUE	TRBV12-3*01	TRBD2*02	TRBJ2-7*01
21	TGTGCTGTGAGTATAATTCAGGGAGCCCAGAAGCTGGTATTT	CAVSIIQGAQKLVF	TRUE	TRAV8-6*01	NA	TRAJ54*01
21	TGTGCAATGAGACCTTTATAATGCTGGCAACAACCGTAAGCTGATTTGG	CAMRPL*C_GNNRKLIW	FALSE	TRAV14/DV4*01	NA	TRAJ38*01
21	TGTGCCAGCAGCCACGGGAGTTGGAACGAGCAGTACTTC	CASSHGSWNEQYF	TRUE	TRBV7-2*01	TRBD2*02	TRBJ2-7*01
20	TGTGCTACGTGCCGGGTTAATAGGAAACTGACATTTG	CATCRV_IGN*HL	FALSE	TRAV17*01	NA	TRAJ61*01
19	TGTGCCTGGGAGTCTAACGACTACAAGCTCAGCTTT	CAWESNDYKLSF	TRUE	TRAV17*01	NA	TRAJ20*01
19	TGCGCCAGGGTCCCCAGGGCTGTGCGAACACCGGGGAGCTGTTTTTT	CARVPRAV_NTGELFF	FALSE	TRBV5-1*01	TRBD1*01	TRBJ2-2*01
19	TGTGCAGGAGCTACCGGAACCTACAAATACATCTTT	CAGATGTYKYIF	TRUE	TRAV27*01	NA	TRAJ40*01
17	TGTGTTATCATGGGTTGAAATACCTAACACTGCAAATCATTTTTGTATGGGGATTTGCTATAGTGTGAATTCAGGATACAGCACCCTCACCTTT	CVIMG*NT*HCKSFLY_GICYSVNSGYSTLTF	FALSE	TRAV8-2*01	NA	TRAJ11*01
16	TGCGCCAGCAGCCCCCGGGACAGGGATTTTTTCGGGGAGCTGTTTTTTT	CASSPRDR_IFSGSCFF	FALSE	TRBV4-3*01	TRBD1*01	TRBJ2-2*01
16	GGGCCAGGCACGCGGCTCCTGGTGCTCGGTGAGCGCGGGCTGCTGGGGCGCGGGCGCGGGCGGCTTGGGTCTGGTTTTTGCGGGGAGTCCCCGGGCTGTGCTCTGGGGCCAACGTCCTGACTTTC	GPGTRLLVLGERGLLGRGRGR_WVWFLRGVPGLCSGANVLTF	FALSE	TRBV13*02	TRBD2*01	TRBJ2-6*01
16	TGTGCCAGCAGCGGGACAGGCACTGAAGCTTTCTTT	CASSGTGTEAFF	TRUE	TRBV6-2*01	TRBD1*01	TRBJ1-1*01
16	TGTGCTCTTGGGGAACTCGGGAATGGAGGCTTCAAAACTATCTTT	CALGELGNGGFKTIF	TRUE	TRDV1*01	NA	TRDJ1*01
15	TGTGCCAGCAGTTCAGACAGCTACGAGCAGTACTTC	CASSSDSYEQYF	TRUE	TRBV28*01	TRBD1*01	TRBJ2-7*01
15	TGTGTTGTGAGTGGGGCGGACAGCTGGGGGATTGCAGTTT	CVVSGAD_AGGLQF	FALSE	TRAV8-2*01	NA	TRAJ24*02
14	TGTGCAGAGAGTATTTAGTAGGGCAACACAGGCAAACTAATCTTT	CAESI**GNTGKLIF	FALSE	TRAV5*01	NA	TRAJ37*01
14	TGCAGTGCTAGAGCCTCGAACATAGGCCTTGGAGAAATCAGCCCCAGCATTTT	CSARASNIG_WRNQPQHF	FALSE	TRBV20-1*05	NA	TRBJ1-5*01
13	TGTGCAGACGCGCCAGGAGGAAGCTACATACCTACATTT	CADAPGGSYIPTF	TRUE	TRAV13-2*01	NA	TRAJ6*01
13	TGTGCCAGCAGTTACACGGGTCAGCCCCAGCATTTT	CASSYTGQPQHF	TRUE	TRBV6-2*01	NA	TRBJ1-5*01
13	TGTGCCGTGATGTCAGGAACCTACAAATACATCTTT	CAVMSGTYKYIF	TRUE	TRAV12-2*01	NA	TRAJ40*01
12	TGTGTGCTGAGTTAAATCGACCAGGGAGGAAAGCTTATCTTC	CVLS*IDQGGKLIF	FALSE	TRAV16*01	NA	TRAJ23*01
12	TGTGCCACCCTTTAATCCGGCTGCGCGGGGGCGAGGTTACGAGCAGTACTTC	CATL*SGCA_GRGYEQYF	FALSE	TRBV2*01	TRBD2*01	TRBJ2-7*01
11	TGTGCCGTGACCGATAGCAACTATCAGTTAATCTGG	CAVTDSNYQLIW	TRUE	TRAV12-2*01	NA	TRAJ33*01
10	TGTGCCAGCTCAGTTTTCACAGACATGAGGGATGGCTACACCTTC	CASSVFTDMRDGYTF	TRUE	TRBV27*01	TRBD2*02	TRBJ1-2*01
10	TGTGCTCTTGGGGAACTAGGTCAGGGAGCCCAGAAGCTGGTATTT	CALGELGQGAQKLVF	TRUE	TRDV1*01	TRDD3*01	TRDJ1*01
9	TGTGCCGTGTCCTCAGGAACCTACAAATACATCTTT	CAVSSGTYKYIF	TRUE	TRAV12-2*01	NA	TRAJ40*01
8	TGTGCTGAGTTAAATCGACCAGGGAGGAAAGCTTATCTTC	CAELNRP_GGKLIF	FALSE	TRAV17*01	NA	TRAJ23*01
7	TGTGCAGAGGCGGCCAGGGTAACAATGCCAGACTCATGTTTT	CAEAARVTMPDSCF	TRUE	TRAV13-2*01	NA	TRAJ31*01
7	TGTGCCAGCAGTTTATGCGGTTGGACAGGGTTACTATGGCTACACCTTC	CASSLCGW_QGYYGYTF	FALSE	TRBV28*01	TRBD1*01	TRBJ1-2*01
7	TATGCTGTGAGTGGTCTGATTTTCTCAGCATCTCTGGGGTTTTTGCAAAGAAAGGAAACTCTGTGCATACTCTGGGGCTGGGAGTTACCAACTCACTTTC	YAVSGLIFSASLGFLQR_RKLCAYSGAGSYQLTF	FALSE	TRAV8-4*01	NA	TRAJ28*01
7	TGTGCTCAGCAGAGACTGGGGGGTTTTGAAGTGGCCCTGGGAGGCTGTGCTCTGGAAACACCATATATTTT	CAQQRLGGFEVA_GRLCSGNTIYF	FALSE	TRBV7-7*01	TRBD1*01	TRBJ1-3*01
7	TGTGCCAGCAGCGTCGCAATACAGCCCCAGCATTTT	CASSVAIQPQHF	TRUE	TRBV2*01	NA	TRBJ1-5*01
6	TGTGCTGTGGGGGGTTCGTTTTCAGATGGCCAGAAGCTGCTCTTTG	CAVGGSFS_MARSCSL	FALSE	TRAV22*01	NA	TRAJ16*01
6	TGTGCCAGCAGTCCCAGCTCAGGGCCTAATGAAAAACTGTTTTTT	CASSPSSGPNEKLFF	TRUE	TRBV28*01	TRBD1*01	TRBJ1-4*01
5	TGTGCCAGCAGTTCGTCGGGACAGCCTAATGAAAAACTGTTTTTT	CASSSSGQPNEKLFF	TRUE	TRBV28*01	TRBD1*01	TRBJ1-4*01
5	TGTGCAATGAGCATTTATGGCAACACAGGCAAACTAATCTTT	CAMSIYGNTGKLIF	TRUE	TRAV12-3*01	NA	TRAJ37*01
5	TGTGCTACGGACAATGGCGGATCTGAAAAGCTGGTCTTT	CATDNGGSEKLVF	TRUE	TRAV17*01	NA	TRAJ57*01
4	TATGCTGTGAGTGGTCTGATTTTCTCAGCATCTCTGGGGTTTTTGCAAAGAAAGGAAACTCTGTGCATACTCTGGGGCTGGGAGTTACCAACTCACTTTC	YAVSGLIFSASLGFLQR_RKLCAYSGAGSYQLTF	FALSE	TRAV8-6*01	NA	TRAJ28*01
4	TGTGCTCTTGGGGAACTACCCGTCTACAAGCTCAGCTTT	CALGELPVYKLSF	TRUE	TRDV1*01	NA	TRDJ1*01
4	TGTGCTACGGACGCGACAGTGGAGGTAGCAACTATAAACTGACATTT	CATDATVE_SNYKLTF	FALSE	TRAV17*01	NA	TRAJ53*01
4	TGTGTGGTGAGGCGTGG	CVV_AW	FALSE	TRAV12-1*01	NA	TRAJ20*01
4	TGTGCTCTTGGGGAATTGCCCGACTACAAGCTCAGCTTT	CALGELPDYKLSF	TRUE	TRDV1*01	NA	TRDJ1*01
4	TGTGCTACGGAGGATAGCAACTATCAGTTAATCTGG	CATEDSNYQLIW	TRUE	TRAV17*01	NA	TRAJ33*01
3	TGTGCCAGCAGCCAAGAATGGCGGGAGAGTCTCAATGAGCAGTTCTTC	CASSQEWRESLNEQFF	TRUE	TRBV4-2*01	TRBD2*02	TRBJ2-1*01
3	TATGCCTTCAATGTGATTTTCACCTTGACCCCTGTCACTGTGTGAACACTGAAGCTTTCTTT	YAFNVIFTLT_CHCVNTEAFF	FALSE	TRBV26*01	TRBD1*01	TRBJ1-1*01
3	TGGGCCTCCAGGCTGTGAGCACAGATACGCAGTATTTT	WASRL*_TDTQYF	FALSE	TRBV14*02	NA	TRBJ2-3*01
2	TGTGCTCAGCAGAGACTGGGGGGTTTTGAAGTGGCCCTGGGAGGCTGTGCTCTGGAAACACCATATATTTT	CAQQRLGGFEVA_GRLCSGNTIYF	FALSE	TRBV6-4*01	TRBD2*01	TRBJ1-3*01
2	TGTGCCAGCAGCTCGGGACAGGGACTTTTACGGGGAGCTGTTTTTT	CASSSGQG_FYGELFF	FALSE	TRBV5-4*01	TRBD1*01	TRBJ2-2*01
2	TGTGCCTCCAGGCTGTGAGCACAGATACGCAGTATTTT	CASRL*_TDTQYF	FALSE	TRBV5-5*02	NA	TRBJ2-3*01
2	TGCGCCAGCAGCCCCC	CAS_AP	FALSE	TRBV4-3*01	NA	TRBJ2-1*01
2	TGTATCATGGTGTAACATTGTGGGGACTAGCGGAGTCCTCCTACAATGAGCAGTTCTTC	CIMV*HCGD*_ESSYNEQFF	FALSE	TRBV12-5*01	TRBD2*01	TRBJ2-1*01
2	TGTGCTGTGGGTTGTAATGCTGGCAACAACCGTAAGCTGATTTGG	CAVGCNAGNNRKLIW	TRUE	TRAV8-3*01	NA	TRAJ38*01
1	TGTGTGGTGTCGACGGAGGGGAATATGGAAACAAACTGGTCTTTGGCGCAGGAACCATTCTGAGAGTCAAGTCCTCTGCTGACAGCCGTGAGAAGAAAAGCAGCGGAGACAAGCTGACTTTT	CVVSTEGNMETNWSLAQEPF_RVKSSADSREKKSSGDKLTF	FALSE	TRAV12-1*01	NA	TRAJ46*01
1	TAGCAGTGGTATCAACGCAGAGTACATGGGGAGCCTTAGAGGTTTGCATGCGGGATTGCACCTCCGTGCTCCTACGAGCAGTACTTC	*QWYQRRVHGEP*RFACGIAPPCSYEQYF	FALSE	TRBV20-1*02	TRBD2*02	TRBJ2-7*01
1	TAGCAGTGGTATCAACGCAGAGTACATGGGACACTCATGATGCACTGTGTAGCAATCAGCCCCAGCATTTT	*QWYQRRVHGTL_DALCSNQPQHF	FALSE	TRBV20/OR9-2*02	TRBD1*01	TRBJ1-5*01
1	TGTGCTGTGAGTGATTGGATAGTGATACTCTGGGGCTGGGAGTTACCAACTCACTTTC	CAVSDWIVIL_GAGSYQLTF	FALSE	TRAV8-6*01	NA	TRAJ28*01
1	TGTGCCAGCAGCGTAGAGGGGGGTTACTACAGATACGCAGTATTTT	CASSVEGG_TTDTQYF	FALSE	TRBV9*01	TRBD1*01	TRBJ2-3*01
1	TGTGCAGAGAGTATTTAGTATGGCAACACAGGCAAACTAATCTTT	CAESI*YGNTGKLIF	FALSE	TRAV5*01	NA	TRAJ37*01
1	TGTGCCAGCACCCCCAGGGAGCGGGAGACAATGAGCAGTTCTTC	CASTPRE_GDNEQFF	FALSE	TRBV6-5*01	TRBD2*02	TRBJ2-1*01
1	TGTGCCAGCAGCTTAAGCCTAGCGGGATACGAGCAGTACTTC	CASSLSLAGYEQYF	TRUE	TRBV7-3*01	TRBD2*02	TRBJ2-7*01
1	TGCATCGTCAGAGTCGGGGTGAACACAGGCAAACTAATCTTT	CIVRVGVNTGKLIF	TRUE	TRAV26-1*01	NA	TRAJ37*01
1	TGTGCTACGGCCTCTTTATAACACCGACAAGCTCATCTTT	CATASL*_TDKLIF	FALSE	TRAV17*01	NA	TRAJ34*01
1	TGTGCCAGCAGTGCTACATGGGGAAGCTTTCTTT	CASSAT_GEAFF	FALSE	TRBV6-2*01	NA	TRBJ1-1*01
1	TGTGCTGTGAAGGCAGGAAAGCTTATCTTC	CAVKAGKLIF	TRUE	TRAV21*02	NA	TRAJ23*01
1	GGCAGTGCTACAGGGGTTGAAGCTTTCTTT	GSATGVEAFF	TRUE	TRBV20-1*01	NA	TRBJ1-1*01
1	TGTGCCAGCAGTTCTTC	CAS_FF	FALSE	TRBV6-2*01	NA	TRBJ2-1*01
1	TGTGCTGCATTGCG	CA_IA	FALSE	TRAV36/DV7*04	NA	TRAJ35*01
1	TGTGCTGAGAGGCGCTGCTGGGCGTCTGGGCGGAGGACTCCTGGTTCTGGGGGCTGGGAGAGCGATGGGGCTCTCAGCGGTGGGAAGGACCCGAGCTGAGTCTGGGACAGCAGAGCGGGCAGCACCGGTTTTTGTCCTGGGCCTCCAGGTTGTGGGCACAGATACGCAGTATTTT	CAERRCWASGRRTPGSGGWESDGALSGGK_TRAESGTAERAAPVFVLGLQVVGTDTQYF	FALSE	TRBV7-6*02	TRBD1*01	TRBJ2-3*01
1	TGTGCCATGGGCCCTGGGCTCCTCTGCTGGGTGCTGCTTTGTCTCCTGGGAGCAGCAGCTCGGGACAGCTCAGGCCGCCTCGAGACCCAGTACTTC	CAMGPGLLCWVLLCLLGAAARDSSGRLETQYF	TRUE	TRBV2*01	TRBD1*01	TRBJ2-5*01
1	TGTGCTCTTCCGATCCAAGCAGTGGTATCAACGCAGAGTACATGGGGGCCTTAAATCATTGTGTGATCAAAGCTGCAGGCAACAAGCTAACTTTT	CALPIQAVVSTQSTWG_LNHCVIKAAGNKLTF	FALSE	TRAV6*01	NA	TRAJ17*01
1	TAGCAGTGGTATCAACGCAGAGTACATGGGGGGCAGCCCCTTCCCACTGTGCTCCTACAATGAGCAGTTCTTC	*QWYQRRVHGGQ_PFPLCSYNEQFF	FALSE	TRBV20/OR9-2*02	TRBD1*01	TRBJ2-1*01
1	TGTGCTCTTCCGATCTAAGCAGTGGTATCAACGCAGAGTACATGGGTGGTTCTGCAAGGCAACTGACCTTT	CALPI*AVVSTQ_YMGGSARQLTF	FALSE	TRAV16*01	NA	TRAJ22*01
1	TGTGCCAGCAGTTACCCAGAGGGGACTAGCGGGATCTACAGATACGCAGTATTTT	CASSYPEGT_AGSTDTQYF	FALSE	TRBV6-8*01	TRBD2*02	TRBJ2-3*01
1	TGTGCCACCCTTTAATCCGGCTGCGCGGGGGTGAGGTTACGAGCAGTACTTC	CATL*SGCA_G*GYEQYF	FALSE	TRBV2*01	TRBD2*01	TRBJ2-7*01
1	TGTGCCAGCAGCTTAAGCCTAGCGGGATCCCCCGCCCCCCCCCCCCCC	CASSLSLAGSPAPPPP	TRUE	TRBV7-3*01	TRBD2*02	TRBJ2-3*01
1	TGCGCCAGCAGCCCCCGGGACAGGGGAGCCCGGTGAGCAGTACTTC	CASSPRDR_EPGEQYF	FALSE	TRBV4-3*01	TRBD1*01	TRBJ2-7*01
1	TGTGCTCTTGGGGTGTTATCTGGGGGTTACCAGAAAGTTACCTTT	CALGVLSGGYQKVTF	TRUE	TRAV9-2*01	NA	TRAJ13*01
1	TGTGCCAGCAGCTTGGGGCAGGGGGGAGGCGAAAAACTGTTTTTT	CASSLGQGGGEKLFF	TRUE	TRBV5-8*01	TRBD1*01	TRBJ1-4*01
1	TGCGCCAGCAGCCCCCGGGACAGGGTAACACTGAAGCTTTCTTT	CASSPRD_GNTEAFF	FALSE	TRBV4-3*01	TRBD1*01	TRBJ1-1*01
1	TGTGCTGTGAGTACAATTCAGGGAGCCCAGAAGCTGGTATTT	CAVSTIQGAQKLVF	TRUE	TRAV8-6*01	NA	TRAJ54*01
1	TGTGCTCTTGGGGTATTTAACACCGACAAGCTCATCTTT	CALGVFNTDKLIF	TRUE	TRDV1*01	TRDD1*01	TRDJ1*01
1	TGTGCTCTTGGGGATCTTAACAATGCCAGACTCATGTTT	CALGDLNNARLMF	TRUE	TRDV1*01	NA	TRDJ1*01
1	TGTGCCAGCAGTTTAGCGCTGGATGAACCCCACTTT	CASSLALDEPHF	TRUE	TRBV12-3*01	NA	TRBJ1-6*02
1	TGCAGTGGTATCAACGCAGAGTACATGGGGATTTTT	CSGINAEYMGIF	TRUE	TRBV20-1*02	NA	TRBJ1-5*01
1	TGCAGCTGTGCTCCTATAATTCACCCCTCCACTTT	CSCAPI_SPLHF	FALSE	TRBV29/OR9-2*01	NA	TRBJ1-6*02
1	TGTAACTATGGAGGAAGCTACATACCTACATTT	CNYGGSYIPTF	TRUE	TRAV25*01	NA	TRAJ6*01

## Sheet: 6 UBV IPS
cloneCount	targetSequences	aaSeqCDR3	productiveTCR	V_gene	D_gene	J_gene
1693592	TGTGCCAGCAGTTTAGCGCTGGATGAGCAGTTCTTC	CASSLALDEQFF	TRUE	TRBV12-3*01	NA	TRBJ2-1*01
1416430	TGTGCCAGCAGTGCTACAGGGGTTGAAGCTTTCTTT	CASSATGVEAFF	TRUE	TRBV6-2*01	TRBD1*01	TRBJ1-1*01
1104841	TGTGCTGGAAACCAGGGAGGAAAGCTTATCTTC	CAGNQGGKLIF	TRUE	TRAV21*01	NA	TRAJ23*01
448472	TGTGCTGGGAACCAGGGAGGAAAGCTTATCTTC	CAGNQGGKLIF	TRUE	TRAV21*02	NA	TRAJ23*01
261687	TGTGCCAGCAGCTTAGAACTAGCAATGGAAGAGACCCAGTACTTC	CASSLELAMEETQYF	TRUE	TRBV7-9*03	TRBD2*01	TRBJ2-5*01
247559	TGCATCGTCACGATCGGGGCTCTGGCAACACAGGCAAACTAATCTTT	CIVTIGAL_NTGKLIF	FALSE	TRAV26-1*02	NA	TRAJ37*01
219399	TGTGCCAGCAGCTCGGGACAGCTCAGGCCGCCTCGAGACCCAGTACTTC	CASSSGQL_GRLETQYF	FALSE	TRBV5-4*01	TRBD1*01	TRBJ2-5*01
172815	TGACTCCTCAGGAACCTACAAATACATCTTT	*LLRN_YKYIF	FALSE	TRAV27*01	NA	TRAJ40*01
140727	TGTGCCAGCAGCTTAAGCCTAGCGGGATCTACAGATACGCAGTATTTT	CASSLSLAGSTDTQYF	TRUE	TRBV7-3*01	TRBD2*02	TRBJ2-3*01
56911	TGTGCCGTGAACCCCGGTAACCAGTTCTATTTT	CAVNPGNQFYF	TRUE	TRAV12-2*01	NA	TRAJ49*01
54079	TGCGCCAGCAGCCCCCGGGACAGGGACTTTTACGGGGAGCTGTTTTTT	CASSPRDRDFYGELFF	TRUE	TRBV4-3*01	TRBD1*01	TRBJ2-2*01
52322	TGTGCCAGCAGTGCTACAGGGGTTGAAGCTTTCTTT	CASSATGVEAFF	TRUE	TRBV6-3*01	TRBD1*01	TRBJ1-1*01
32642	TGCAGTGTTCTCAAGGACAGAATGAAAAACTGTTTTTT	CSVLKD_NEKLFF	FALSE	TRBV20-1*05	TRBD1*01	TRBJ1-4*01
27968	TGTGCCAGCACCCCCAGGGAGCGGGAGAACACCTACGAGCAGTACTTC	CASTPRERENTYEQYF	TRUE	TRBV6-5*01	TRBD2*02	TRBJ2-7*01
21465	TGTGCTGTGGAGGGATTATGGAGGAAGCCAAGGAAATCTCATCTTT	CAVEGLWR_SQGNLIF	FALSE	TRAV21*01	NA	TRAJ42*01
17084	TGTGCCAGCAGTGAATATCCCCTGGGGGGCACTGAAGCTTTCTTT	CASSEYPLGGTEAFF	TRUE	TRBV6-1*01	TRBD1*01	TRBJ1-1*01
14658	TGTGTGGTGTCGACGGAGGGGAATATGGAAACAAACTGGTCTTT	CVVSTEG_YGNKLVF	FALSE	TRAV12-1*01	NA	TRAJ47*01
14645	TGTGCTTTCCCAATTCAGGGAGCCCAGAAGCTGGTATTT	CAFPIQGAQKLVF	TRUE	TRAV41*01	NA	TRAJ54*01
13433	TGTGCAGAGAGAGGGTGGAACAATGACATGCGCTTT	CAERGWNNDMRF	TRUE	TRAV5*01	NA	TRAJ43*01
10807	TGTGCCAGCAGTTACCCAGAGGGGACTAGCGGGGGGGTTCTGCACAGATACGCAGTATTTT	CASSYPEGTS_GGFCTDTQYF	FALSE	TRBV6-8*01	TRBD2*01	TRBJ2-3*01
10010	TGTGCCAGCAGCTTACACCCACAGGGCCCATTGGGATGAGGAGTTCTTC	CASSLHPQ_AHWDEEFF	FALSE	TRBV7-3*01	TRBD2*02	TRBJ2-1*01
8907	TCCCCCCACGGAGGTAGCAACTATAAACTGACATTT	SPHGGSNYKLTF	TRUE	TRAV41*01	NA	TRAJ53*01
8783	TGTGCCAGCAGCCTAACAGGGGTAGAAGCTTTCTTT	CASSLTGVEAFF	TRUE	TRBV6-2*01	TRBD1*01	TRBJ1-1*01
8517	TGTGCCACGTCAGACAGGACAGGCCAGTACGAGCAGTACTTC	CATSDRTGQYEQYF	TRUE	TRBV15*02	TRBD1*01	TRBJ2-7*01
8039	TGTGCTGTGGAAGGCTATGGTCAGAATTTTGTCTTT	CAVEGYGQNFVF	TRUE	TRAV22*01	NA	TRAJ26*01
7994	TGTGCCAGCAGTGACGGGGCGGGAGACAATGAGCAGTTCTTC	CASSDGAGDNEQFF	TRUE	TRBV6-4*01	TRBD2*02	TRBJ2-1*01
7155	TGTGCCAGCAGCCAAGGTTGGGGGGAACTACAATGAGCAGTTCTTC	CASSQGWG_NYNEQFF	FALSE	TRBV3-1*01	TRBD2*01	TRBJ2-1*01
6626	TGCGCTGTTGTATCAATTTCAGGATACAGCACCCTCACCTTT	CAVVSISGYSTLTF	TRUE	TRAV1-1*01	NA	TRAJ11*01
5975	TGTGCCAGCAGCCCCGGCACAGGGCCTAATGAAAAACTGTTTTTT	CASSPGTGPNEKLFF	TRUE	TRBV28*01	TRBD1*01	TRBJ1-4*01
5924	TGTGCTGTGGAAGGGTGGGGAAGCCAAGGAAATCTCATCTTT	CAVEGWGSQGNLIF	TRUE	TRAV22*01	NA	TRAJ42*01
5870	TGTGCCAGCAATACGGCCCAAGAGACCCAGTACTTC	CASNTAQETQYF	TRUE	TRBV6-1*01	NA	TRBJ2-5*01
4486	TGCGCCAGCAGCTTGGAGGGACAGGGTAACACTGAAGCTTTCTTT	CASSLEGQGNTEAFF	TRUE	TRBV5-1*01	TRBD1*01	TRBJ1-1*01
3799	TGTGCTCTGAGTGAGGGTTGCCGGCACTGCCAGTAAACTCACCTTT	CALSEGCR_TASKLTF	FALSE	TRAV19*01	NA	TRAJ44*01
3566	TGTGCCAGCTCACCCGAGGGACAGTACTATGAAAAACTGTTTTTT	CASSPEGQYYEKLFF	TRUE	TRBV18*01	TRBD1*01	TRBJ1-4*01
3391	TGTGCTGAGAGGCGCTGCTGGGCGTCTGGGCGGAGGACTCCTGGTTCTGGGTGCTGGGAGAGCGATGGGGCTCTCAGCGGTGGGAAGGACCCGAGCTGAGTCTGGGACAGCAGAGCGGGCAGCACCGGTTTTTGTCCTGGGCCTCCAGGCTGTGAGCACAGATACGCAGTATTTT	CAERRCWASGRRTPGSGCWESDGALSGGK_TRAESGTAERAAPVFVLGLQAVSTDTQYF	FALSE	TRBV7-7*02	TRBD1*01	TRBJ2-3*01
3172	TGTGCCAGTAGGGGGGACAACTACGAGCAGTACTTC	CASRGDNYEQYF	TRUE	TRBV19*01	TRBD1*01	TRBJ2-7*01
3170	TGCAGTGCTAGGGGGGACTCCTACGAGCAGTACTTC	CSARGDSYEQYF	TRUE	TRBV20-1*01	NA	TRBJ2-7*01
3084	TGTGCCAGCAGCCCTTTAGTGGACAGATCTCAAGAGACCCAGTACTTC	CASSPLVDRSQETQYF	TRUE	TRBV27*01	TRBD1*01	TRBJ2-5*01
2745	TGCAGTGCTAGTTTGGGAGGGGGCGAGCAGTACTTC	CSASLGGGEQYF	TRUE	TRBV20-1*04	TRBD2*02	TRBJ2-7*01
2640	TGCGCCAGCAGCCCCCGGGACAGGGACTTTTACGGGGAGCTGTTTTTTT	CASSPRDR_TFTGSCFF	FALSE	TRBV4-3*01	TRBD1*01	TRBJ2-2*01
2353	TGTGCCAGCAGCCCAACAGGGGTCTTCGACGAGCAGTACTTC	CASSPTGVFDEQYF	TRUE	TRBV7-2*01	TRBD1*01	TRBJ2-7*01
2234	TGTGCCAGCAGTGAACAGGGCGCCGGACTAGCGGGGTACGAGCAGTACTTC	CASSEQGAGLAGYEQYF	TRUE	TRBV2*01	TRBD2*01	TRBJ2-7*01
2221	TGTGCAGCAGGGTTTCTGGGGGTTACCAGAAAGTTACCTTT	CAAGFLG_YQKVTF	FALSE	TRAV13-1*01	NA	TRAJ13*02
2192	TGTGCCAGCAGCTTAGCGGTTTTATCGGGGCAAAATGAAGCTTTCTTT	CASSLAVLSGQNEAFF	TRUE	TRBV7-8*01	TRBD2*01	TRBJ1-1*01
2179	TGTGCTACGGAGGATAGCAACTATCAGTTAATCTGG	CATEDSNYQLIW	TRUE	TRAV17*01	NA	TRAJ33*01
2086	TGCGGCACAGTGGGTGGTGGTACTAGCTATGGAAAGCTGACATTT	CGTVGGGTSYGKLTF	TRUE	TRAV30*01	NA	TRAJ52*01
1932	TGTGCCAGCAGCCAAGAAGGGGGCTATTACAATGAGCAGTTCTTC	CASSQEGGYYNEQFF	TRUE	TRBV4-2*01	TRBD1*01	TRBJ2-1*01
1804	TGTGCCACAAGAGGGGACTCCTACGAGCAGTACTTC	CATRGDSYEQYF	TRUE	TRBV19*01	NA	TRBJ2-7*01
1780	TGTGCTGTCCCGCTTGGGAATGAGAAATTAACCTTT	CAVPLGNEKLTF	TRUE	TRAV22*01	NA	TRAJ48*01
1667	TGTGCCAGCAGTCCTACGACAGGCGAGTACAGCGGTAATGAAAAACTGTTTTTT	CASSPTTGEYSGNEKLFF	TRUE	TRBV28*01	TRBD1*01	TRBJ1-4*01
1580	TGTGCCAGCAGCTGGGGGTGGCTACACCTTC	CASSW_GGYTF	FALSE	TRBV11-3*01	TRBD1*01	TRBJ1-2*01
1491	TGCGCCAGCAGCCAAGACCGAGGGGGTGCAGCGGGCGGCTACACCTTC	CASSQDRGGAAGGYTF	TRUE	TRBV4-3*01	TRBD1*01	TRBJ1-2*01
1479	TGTGCCAGCAGCTTGCAGGGTACCTACGAGCAGTACTTC	CASSLQGTYEQYF	TRUE	TRBV7-3*01	TRBD1*01	TRBJ2-7*01
1448	TGTGCCAGCAGCTCTAGCGGACATTACAATGAGCAGTTCTTC	CASSSSGHYNEQFF	TRUE	TRBV11-3*04	TRBD1*01	TRBJ2-1*01
1424	TGTGCCACCAGCGACAGGACAGGGGAATACGAGCAGTACTTC	CATSDRTGEYEQYF	TRUE	TRBV15*02	TRBD1*01	TRBJ2-7*01
1389	TGTGCCAGCAGCCAAGAATGGCGGGAGAGTCCCAATGAGCAGTTCTTC	CASSQEWRESPNEQFF	TRUE	TRBV4-2*01	TRBD2*02	TRBJ2-1*01
1356	TGTGCCACCAGCAGAGGAGGAGGAGCGGGAGGCTCCGAGCAGTACTTC	CATSRGGGAGGSEQYF	TRUE	TRBV15*02	TRBD2*02	TRBJ2-7*01
1273	TGTGCTCTTGGGGAACTACCCGACTACAAGCTCAGCTTT	CALGELPDYKLSF	TRUE	TRDV1*01	NA	TRDJ1*01
1246	TGTGCAGCAGATATGGAGGAAGCCAAGGAAATCTCATCTTT	CAADMEE_QGNLIF	FALSE	TRAV29/DV5*01	NA	TRAJ42*01
1177	TGTGCAGTGCGGGGGTGGGATTCAGGAGGAGGTGCTGACGGACTCACCTTT	CAVRGWDSGGGADGLTF	TRUE	TRAV5*01	NA	TRAJ45*01
1142	TGTGCCGCGTCTCGGGGCTGTGAGCCAAAAACATTCAGTACTTC	CAASRGC_AKNIQYF	FALSE	TRBV3-1*02	TRBD1*01	TRBJ2-4*01
893	TGTGCCGTCAAGGATTCTGGGGGTTACCAGAAAGTTACCTTT	CAVKDSGGYQKVTF	TRUE	TRAV12-2*01	NA	TRAJ13*01
870	TGTGCCAGCAGCGTAGAGGAAGTCACAGATACGCAGTATTTT	CASSVEEVTDTQYF	TRUE	TRBV9*01	NA	TRBJ2-3*01
811	TGTGCCACGTCAGACAGGACAAGCCAGTACGAGCAGTACTTC	CATSDRTSQYEQYF	TRUE	TRBV15*02	TRBD1*01	TRBJ2-7*01
782	TGTGCCAGCAGTTTAGCACTAGACGAGCAGTTCTTC	CASSLALDEQFF	TRUE	TRBV12-3*01	NA	TRBJ2-1*01
668	TGCAGTGTTCTCAAGGACAGAATGAAAAACTTTTTT	CSVLKDRMKNFF	TRUE	TRBV20-1*01	TRBD1*01	TRBJ1-4*01
612	TGTGCCAGCAGCTTAGATTTGGGCTCCACTGAAGCTTTCTTT	CASSLDLGSTEAFF	TRUE	TRBV11-3*01	NA	TRBJ1-1*01
537	TGTGCCAGCAGCGCCGGTGGGGCCGTCCCTCAAGAGACCCAGTACTTC	CASSAGGAVPQETQYF	TRUE	TRBV9*03	TRBD2*02	TRBJ2-5*01
515	TGTGCTCTGACTAATTTTTATACAACTTCAACAAATTTTACTTT	CALTNFY_NFNKFYF	FALSE	TRAV19*01	NA	TRAJ21*01
476	TGTGCCAGCAGCTTAGAGCTAGGGATGGAGGAGACCCAGTACTTC	CASSLELGMEETQYF	TRUE	TRBV7-9*03	NA	TRBJ2-5*01
394	TGTGCAATGAGTCGCGGATCTGAAAAGCTGGTCTTT	CAMSRGSEKLVF	TRUE	TRAV12-3*01	NA	TRAJ57*01
308	TGTGCCAGCAGCAAAAGTCTAGGCAGGGACAGAAAAACAATGAGCAGTTCTTC	CASSKSLGR_QKNNEQFF	FALSE	TRBV21-1*01	TRBD1*01	TRBJ2-1*01
298	TGCGCCAGCAGTCCTAGTTTACAATGAGCAGTTCTTC	CASSPS_YNEQFF	FALSE	TRBV23-1*01	TRBD2*01	TRBJ2-1*01
221	TGCGCCAGCAGCCAAGATCGGGGCGTAGGCCAGAACACCGGGGAGCTGTTTTTT	CASSQDRGVGQNTGELFF	TRUE	TRBV4-3*01	TRBD1*01	TRBJ2-2*01
180	GGTGCCAGCAGCTTAGCGGTTTTATCGGGGCAAAATGAAGCTTTCTTT	GASSLAVLSGQNEAFF	TRUE	TRBV7-8*01	TRBD2*01	TRBJ1-1*01
153	TGTGCCAGCAGCGTAGAGGGGGGTTACTACAATGAGCAGTTCTTC	CASSVEGGYYNEQFF	TRUE	TRBV9*01	TRBD1*01	TRBJ2-1*01
148	TGCAGTGCACCGACAGGGCGTATAATCAGCCCCAGCATTTT	CSAPTGR_NQPQHF	FALSE	TRBV20-1*01	TRBD1*01	TRBJ1-5*01
146	TGCGCCAGCAGCCCGCAGGGTGCAGGCCCTTTAGACGAGCAGTACTTC	CASSPQGAGPLDEQYF	TRUE	TRBV5-1*01	TRBD2*02	TRBJ2-7*01
130	TGTGCTGAGAGGCGCTGCTGGGC	CAER_LLG	FALSE	TRBV6-6*05	NA	TRBJ2-2P*01
110	TGTGCCAGCAGCTCCCTAGCGTCTAGCACAGATACGCAGTATTTT	CASSSLASSTDTQYF	TRUE	TRBV5-4*01	NA	TRBJ2-3*01
104	TGCAGTGCTAGGGGGGACTCCTACGAGCAGTACTTC	CSARGDSYEQYF	TRUE	TRBV20-1*03	NA	TRBJ2-7*01
101	TGTGCCAGCAGTTTTGAGTACCCGGGACAGGGGGTTAGGGGCTACACCTTC	CASSFEYPGQGVRGYTF	TRUE	TRBV27*01	TRBD1*01	TRBJ1-2*01
92	TGTGCCAGCAGCCCAGATTTGGGAAGCACTGAAGCTTTCTTT	CASSPDLGSTEAFF	TRUE	TRBV11-3*01	NA	TRBJ1-1*01
90	GGGCCAGGCACGCGGCTCCTGGTGCTCGGTGAGCGCGGGCTGCTGGGGCGCGGGCGCGGGCGGCTTGGGTCTGGTTTTTGCGGGGAGTCCCCGGGCTGTGCTCTGGGGCCAACGTCCTGACTTTC	GPGTRLLVLGERGLLGRGRGR_WVWFLRGVPGLCSGANVLTF	FALSE	TRBV13*02	TRBD2*01	TRBJ2-6*01
86	TGTGCCAGCAGTGCTACAGGGACACCCGGGGATTTT	CASSATGTPGDF	TRUE	TRBV6-2*01	TRBD1*01	TRBJ1-5*01
71	TGTGCTGAGTTAAATCGACCAGGGAGGAAAGCTTATCTTC	CAELNRP_GGKLIF	FALSE	TRAV17*01	NA	TRAJ23*01
70	TGTGCCAGCAGTCTACTTCTAGCGGGACCCCCCACAGATACGCAGTATTTT	CASSLLLAGPPTDTQYF	TRUE	TRBV6-3*01	TRBD2*02	TRBJ2-3*01
68	TGTGCCAGCAGTCTGGCCCTCGACGAGCAGTACTTC	CASSLALDEQYF	TRUE	TRBV12-3*01	TRBD2*02	TRBJ2-7*01
67	TGTGCCAGCAGCTGGGGGTGGCTACACCTTC	CASSW_GGYTF	FALSE	TRBV11-3*04	TRBD1*01	TRBJ1-2*01
62	TGTGCCAGCAGCTTAGAGGGACAGTACTATGAAAAACTGTTTTTT	CASSLEGQYYEKLFF	TRUE	TRBV7-2*01	TRBD1*01	TRBJ1-4*01
60	TGTGCCAGCAGCTCGGGACAGCTCAGGCCGCCTCGAGACCCAGTACTTCGGGCCAGGCACGCGGCTCCTGGTGCTCGGTGAGCGCGGGCTGCTGGGGCGCGGGCGCGGGCGGCTTGGGTCTGGTTTTTGCGGGGAGTCCCCGGGCTGTGCTCTGGGGCCAACGTCCTGACTTTC	CASSSGQLRPPRDPVLRARHAAPGAR*ARAAGARARAAWVWFLRGVPGLCSGANVLTF	FALSE	TRBV5-4*01	TRBD2*01	TRBJ2-6*01
51	TGTGCAAGTCGCTCCTCGACAGGGCCCACCTGAAAAACTGTTTTTT	CASRSSTG_PPEKLFF	FALSE	TRBV12-2*01	TRBD2*02	TRBJ1-4*01
51	TGTGCCAGCAGCTTAGACCTCGGGTCGGAAGCAGCTTTCTTT	CASSLDLGSEAAFF	TRUE	TRBV11-3*01	NA	TRBJ1-1*01
51	TGTGCCAGCAGTTTAGCCCTGGACGAACCCCACTTT	CASSLALDEPHF	TRUE	TRBV12-3*01	NA	TRBJ1-6*02
50	TGTGCCAGCAGCCTTTCTAGCGGGAGCGACGAGCAGTACTTC	CASSLSSGSDEQYF	TRUE	TRBV11-3*01	TRBD2*02	TRBJ2-7*01
50	TGTGCTCTTGGGGAACTACCCGACTACAAACTCAGCTTT	CALGELPDYKLSF	TRUE	TRDV1*01	NA	TRDJ1*01
	50 reads threshold
43	TGTGCCAGCAGTCAGACAGGAACTGAAGCTTTCTTT	CASSQTGTEAFF	TRUE	TRBV6-2*01	TRBD1*01	TRBJ1-1*01
41	TGCGCCAGGGTCCCCAGGGCTGTGCGAACACCGGGGAGCTGTTTTTT	CARVPRAV_NTGELFF	FALSE	TRBV5-1*01	TRBD1*01	TRBJ2-2*01
40	TGCGCCAGCAGCCAAGATCGGGGCGTAGGCCAGAACACCGGGGAGCTGTTTCTT	CASSQDRGVGQNTGELFL	TRUE	TRBV4-3*01	TRBD1*01	TRBJ2-2*01
40	TGTGCCAGCAGCGCCCGATCGGGACAGCGGGTTCACCCCTCCACTTT	CASSARSG_AGSPLHF	FALSE	TRBV9*03	TRBD2*01	TRBJ1-6*02
40	TGTGCCAGCAGCTTAGAACTCTCCATGGCAGAGACCCAGTACTTC	CASSLELSMAETQYF	TRUE	TRBV7-9*03	NA	TRBJ2-5*01
40	TGTGCCAGCAGCTTAGAACAGGGACAGGGCGGCTACACCTTC	CASSLEQGQGGYTF	TRUE	TRBV11-2*01	TRBD1*01	TRBJ1-2*01
32	TGTGCCAGCAGTGCAAGCGGGAATCCCTACGAGCAGTACTTC	CASSASGNPYEQYF	TRUE	TRBV6-1*01	NA	TRBJ2-7*01
30	GGTGAGCGCGGGCTGCTGGGGCGCGGGCGCGGGCGGCTTGGGTCTGGTTTTTGCGGGGAGTCCCCGGGCTGTGCTCTGGGGCCAACGTCCTGACTTTC	GERGLLGRGRGRLGSG_LRGVPGLCSGANVLTF	FALSE	TRBV5-5*02	TRBD2*01	TRBJ2-6*01
30	TGTGTCAGCAGCTTAGATTTGGGCTCCACTGAAGCTTTCTTT	CVSSLDLGSTEAFF	TRUE	TRBV11-3*01	NA	TRBJ1-1*01
30	TGTGCCAGCAGCGTTGACCTTGGGAGCGCTGAAGCTTTCTTT	CASSVDLGSAEAFF	TRUE	TRBV11-3*02	TRBD2*02	TRBJ1-1*01
30	TGTGCCAGCAGTGAGACAGGGGGTCCAGCTTTCTTT	CASSETGGPAFF	TRUE	TRBV6-2*01	TRBD1*01	TRBJ1-1*01
24	TGTGCCAGCAGTTCAGACTCCTACGAGCAGTACTTC	CASSSDSYEQYF	TRUE	TRBV28*01	NA	TRBJ2-7*01
22	TGTGCCAGCAGCCGGGGACAGACGAACACTGAAGCTTTCTTT	CASSRGQTNTEAFF	TRUE	TRBV7-6*01	TRBD1*01	TRBJ1-1*01
21	TGTGCCAGCAGCTCTAGCGGGAGTTTCAATGAGCAGTTCTTC	CASSSSGSFNEQFF	TRUE	TRBV11-3*04	TRBD2*02	TRBJ2-1*01
21	TGCGCCAGCAGCCCGACAGGGGAGCCCGGTGAGCAGTACTTC	CASSPTGEPGEQYF	TRUE	TRBV4-3*01	TRBD1*01	TRBJ2-7*01
20	GGGCCAGGCACGCGGCTCCTGGTGCTCGGTGAGCGCGGGCTGCTGGGGCGCGGGCGCGGGCGGCTTGGGTCTGGTTTTTGCGGGGAGTCCCCGGGCTGTGCTCTGGGGTCAACGTCCTGACTTTC	GPGTRLLVLGERGLLGRGRGR_WVWFLRGVPGLCSGVNVLTF	FALSE	TRBV13*01	TRBD2*01	TRBJ2-6*01
20	TGTGCTCAGCAGAGACTGGGGGGTTTTGAAGTGGCCCTGGGAGGCTGTGCTCTGGAAACACCATATATTTT	CAQQRLGGFEVA_GRLCSGNTIYF	FALSE	TRBV6-4*01	TRBD2*01	TRBJ1-3*01
20	TGCGCCAGCAGCCCCCGGGACAGCTCAGGCCGCCTCGAGACCCAGTACTTC	CASSPRDSSGRLETQYF	TRUE	TRBV4-3*01	TRBD1*01	TRBJ2-5*01
20	TGTGCCAGCAGTTTATGCGGTTGGACAGGGTTACTATGGCTACACCTTC	CASSLCGW_QGYYGYTF	FALSE	TRBV28*01	TRBD1*01	TRBJ1-2*01
20	TGTGCTCTTGGGGAATTGCCCGACTACAAGCTCAGCTTT	CALGELPDYKLSF	TRUE	TRDV1*01	NA	TRDJ1*01
20	TGTGCCAGCAGTCGGACAGAATGGGACGAGCAGTACTTC	CASSRTEWDEQYF	TRUE	TRBV25-1*01	TRBD1*01	TRBJ2-7*01
20	TGTGCCAGCAGTCAAACAGGGTCGGAAGCTTTCTTT	CASSQTGSEAFF	TRUE	TRBV6-2*01	TRBD1*01	TRBJ1-1*01
20	TGTGCTGGATTGGAGGGAGGAAAGCTTATCTTC	CAGLEGGKLIF	TRUE	TRAV21*01	NA	TRAJ23*01
14	TGTGCCTGTAGGGGAGACTCCTACGAGCAGTACTTC	CACRGDSYEQYF	TRUE	TRBV19*01	NA	TRBJ2-7*01
12	TGCAGCGTTGAGGAAGGGGAACTCTACGAGCAGTACTTC	CSVEEGELYEQYF	TRUE	TRBV29-1*01	NA	TRBJ2-7*01
10	TGTGTAAGCAGCTTCTGGAAGCAAGGGCCCACACCAGCTCCTCTGGGGTTTGCCACACTCATGATGCACTGTGTAGCAATCAGCCCCAGCATTTT	CVSSFWKQGPTPAPLG_CHTHDALCSNQPQHF	FALSE	TRBV7-9*02	TRBD2*02	TRBJ1-5*01
10	TGTGCTGAGAGGCGCTGCTGGGCGTCTGGGCGGAGGACTCCTGGTTCTGGGTGCTGGGAGAGCGATGGGGCTCTCAGCGGT	CAERRCWASGRRTPGSGCWESDGALSG	TRUE	TRAV8-4*01	NA	TRAJ15*01
10	TATGCCTTCAATGTGATTTTCACCTTGACCCCTGTCACTGTGTGAACACTGAAGCTTTCTTT	YAFNVIFTLT_CHCVNTEAFF	FALSE	TRBV26*01	TRBD1*01	TRBJ1-1*01
10	TGTCCCAGCACCGGTTTTTGTCCTGGGCCTCCAGGCTGTGAGCACAGATACGCAGTATTTT	CPSTGFCPGP_QAVSTDTQYF	FALSE	TRBV4-2*02	TRBD1*01	TRBJ2-3*01
10	TGTGCCAGCAGTTACCCAGAGGGGACTAGCGGGGGGCAGGCGTGAGACCCAGTACTTC	CASSYPEGTS_GGRRETQYF	FALSE	TRBV12-3*01	TRBD2*01	TRBJ2-5*01
10	TGCAGTGCTAGAGCCTCGAACATAGGCCTTGGAGAAATCAGCCCCAGCATTTT	CSARASNIG_WRNQPQHF	FALSE	TRBV20-1*05	NA	TRBJ1-5*01
10	TGCGCCAGCAGCTTGTCCAGTTGGAGCTCCTACAATGAGCAGTTCTTC	CASSLSSWSSYNEQFF	TRUE	TRBV5-1*01	NA	TRBJ2-1*01
10	TGTGCCAGCAGCTCGGGACAGGGACTTTTACGGGGAGCTGTTTTTT	CASSSGQG_FYGELFF	FALSE	TRBV5-4*01	TRBD1*01	TRBJ2-2*01
10	TGTGCCAGCTCACCCGAGGGACAGTAATGTGAAAAACTGTTTTTT	CASSPEGQ*CEKLFF	FALSE	TRBV18*01	TRBD1*01	TRBJ1-4*01
10	TGTGCCATCAGTGCGGACCCGGGAACCTATGGCTACACCTTC	CAISADPGTYGYTF	TRUE	TRBV10-3*01	TRBD1*01	TRBJ1-2*01
10	TGTGCCAGCTTGGCAGGGGACTACAATGAGCAGTTCTTC	CASLAGDYNEQFF	TRUE	TRBV2*01	TRBD1*01	TRBJ2-1*01
10	TGTGCCAGCAGTTTAGCGCTAGACGAGCAGTACTTC	CASSLALDEQYF	TRUE	TRBV12-3*01	NA	TRBJ2-7*01
10	TGTGCCAGCAGTTCAGACAGCTACGAGCAGTACTTC	CASSSDSYEQYF	TRUE	TRBV28*01	TRBD1*01	TRBJ2-7*01
10	TGTGCCAGCAGTCTGGTCCTCGACGAGCAGTACTTC	CASSLVLDEQYF	TRUE	TRBV12-3*01	NA	TRBJ2-7*01
10	TGTGCCAGCAGTGATGCAATTCAGCCCCAGCATTTT	CASSDAIQPQHF	TRUE	TRBV2*01	NA	TRBJ1-5*01
10	TGTGGGTGCAGTTTAGCGCTGGATGAGCAGTTCTTC	CGCSLALDEQFF	TRUE	TRBV12-3*01	NA	TRBJ2-1*01
10	TGTAGCAATCAGCCCCAGCATTTT	CSNQPQHF	TRUE	TRBV15*01	NA	TRBJ1-5*01
5	TGTGCTCAGCAGAGACTGGGGGGTTTTGAAGTGGCCCTGGGAGGCTGTGCTCTGGAAACACCATATATTTT	CAQQRLGGFEVA_GRLCSGNTIYF	FALSE	TRBV7-6*01	TRBD1*01	TRBJ1-3*01
5	GGCGCCAGCAGCCCCCGGGACAGGGACTTTTACGGGGAGCTGTTTTTTT	GASSPRDR_TFTGSCFF	FALSE	TRBV4-3*01	TRBD1*01	TRBJ2-2*01
3	TGTGCCAGCAGTTACCACAGCCAAGAAGCTTTCTTT	CASSYHSQEAFF	TRUE	TRBV6-2*01	NA	TRBJ1-1*01
2	TGTGCCAGCTCGACCGACTCAGGGCCTAATGAAAAACTGTTTTTT	CASSTDSGPNEKLFF	TRUE	TRBV18*01	TRBD1*01	TRBJ1-4*01
2	TGTGCCAGCAGTTTAAGGACGGACCATTGGGATGGCTACACCTTC	CASSLRTDHWDGYTF	TRUE	TRBV27*01	NA	TRBJ1-2*01
2	TGTGCCAGCAGCTTAGAACTCTCCATGGCAGAGACCCAGTACTTC	CASSLELSMAETQYF	TRUE	TRBV7-9*01	NA	TRBJ2-5*01
2	TGCGCCAGCAGCCCCCGGGACAGGGATTACGGGGAGCTGTTTTTT	CASSPRDRDYGELFF	TRUE	TRBV4-3*01	TRBD1*01	TRBJ2-2*01
2	TGCGCCAGCAGCGTAGAGGGGGGTTACTACAATGAGCAGTTCTTC	CASSVEGGYYNEQFF	TRUE	TRBV9*01	TRBD1*01	TRBJ2-1*01
2	TGTGTATGGGAACCGGGACTAATCCTACAATGAGCAGTTCTTC	CVWEPGL_SYNEQFF	FALSE	TRBV6-1*01	TRBD2*01	TRBJ2-1*01
2	TGCAGTGCCTACGCCGCACAGGGCGCTGAAGCTTTCTTT	CSAYAAQGAEAFF	TRUE	TRBV20-1*02	TRBD1*01	TRBJ1-1*01
1	TGCATCGTCACGATCGGGGCTCTGGCAACACAGGCAAACTAATCTTTGGGCAAGGGACAACTTTACAAGTAAAACCAGAGGCCTGAGTCAAGGTTATTGCAATAGTACTAAAGACTGTGTAACACCAATGCAGGCAAATCAACCTTT	CIVTIGALATQAN*SLGKGQLYK*NQRPESRLLQ*Y*RLCNTNAGKSTF	FALSE	TRAV26-1*01	NA	TRAJ27*01
1	TGTGCCAGCAGTCTACTTCTAGCGGGACCCCCCACAGATACGCAGTATTTT	CASSLLLAGPPTDTQYF	TRUE	TRBV6-2*01	TRBD2*02	TRBJ2-3*01
1	TGTGCCAGCAGCTCGGAACAGCTCAGGTCGCCTCGAGACCCAGTACTTC	CASSSEQL_GRLETQYF	FALSE	TRBV5-4*01	NA	TRBJ2-5*01
1	TGTGCCAGCAGTCCCAGCTCAGGGCCTAATGAAAAACTGTTTTTT	CASSPSSGPNEKLFF	TRUE	TRBV28*01	TRBD1*01	TRBJ1-4*01
1	TGTGTGCTGAGTTAAATCGACCAGGGAGGAAAGCTTATCTTC	CVLS*IDQGGKLIF	FALSE	TRAV38-1*01	NA	TRAJ23*01
1	TGTGCTGGAAACCAGGGAGGAAGCCAAGGAAATCTCATCTTT	CAGNQGGSQGNLIF	TRUE	TRAV21*01	NA	TRAJ42*01
1	TGTGCCAGCAGCGTAGAGGAAGTCACAGATACGCAGCATTTT	CASSVEEVTDTQHF	TRUE	TRBV9*01	NA	TRBJ2-3*01
1	TGTGCCAGCAGCTTAGCGACCAGTGAGCAGTTCTTC	CASSLATSEQFF	TRUE	TRBV7-2*02	NA	TRBJ2-1*01
1	TAGCAGTGGTATCAACGCAGAGTACATGGGGACTTC	*QWYQRRVHGDF	FALSE	TRBV20-1*02	NA	TRBJ2-5*01

## Sheet: 7 SFW IPS
cloneCount	targetSequences	aaSeqCDR3	productiveTCR	V_gene	D_gene	J_gene
656594	TGTGCCAGCAGTTTAGCGCTTGATGAGCAGTTCTTC	CASSLALDEQFF	TRUE	TRBV12-4*01	NA	TRBJ2-1*01
604042	TGTGCTGGGAACCAGGGAGGAAAGCTTATCTTC	CAGNQGGKLIF	TRUE	TRAV21*02	NA	TRAJ23*01
541907	TGTGCCAGCAGCGAGGGGAAAGAGCCCGGGGAGCTGTTTTTT	CASSEGKEPGELFF	TRUE	TRBV4-2*01	TRBD1*01	TRBJ2-2*01
323437	TGTGCCGTTATGGATAGCAGCTATAAATTGATCTTC	CAVMDSSYKLIF	TRUE	TRAV12-2*02	NA	TRAJ12*01
252584	TGTGCTCCCCGGGGTGGAGGAAAGCTTATCTTC	CAPRGGGKLIF	TRUE	TRAV2*01	NA	TRAJ23*01
243763	TGTGCCAGCAGTTTAGCGCTTGATGAGCAGTTCTTC	CASSLALDEQFF	TRUE	TRBV12-3*01	NA	TRBJ2-1*01
30947	TGTGCCAGCAGCTTGAGCAGGACCGTAGAGGGTAGGACAATGAGCAGTTCTTC	CASSLSRTV_G*DNEQFF	FALSE	TRBV7-9*04	TRBD2*02	TRBJ2-1*01
22518	TGTGCTGGGCAGTGAGGGAATTATGGAGGAAGCCAAGGAAATCTCATCTTT	CAGQ*GNYGGSQGNLIF	FALSE	TRAV35*01	NA	TRAJ42*01
16362	TGTGCCAGCAATAGTGCAGGACTGGGAACCGGGGAGCTGTTTTTT	CASNSAGLGTGELFF	TRUE	TRBV2*02	NA	TRBJ2-2*01
14205	TGTGCCAGCAGCTTAGAACTAGCGATGGGAGAGACCCAGTACTTC	CASSLELAMGETQYF	TRUE	TRBV7-9*04	TRBD2*01	TRBJ2-5*01
10921	TGTGCCAGCAGCTTGAGCAGGACCGTAGAGGGTAGGACAATGAGCAGTTCTTC	CASSLSRTV_G*DNEQFF	FALSE	TRBV7-9*03	TRBD2*02	TRBJ2-1*01
7717	TGTGCCAGCGGGACTAGCGGGAGTTGGTCAGATACGCAGTATTTT	CASGTSGSWSDTQYF	TRUE	TRBV27*01	TRBD2*02	TRBJ2-3*01
7452	TGCGCCAGCAGCCAAGCGGCGGAGAGCTCCTACGAGCAGTACTTC	CASSQAAESSYEQYF	TRUE	TRBV4-1*01	NA	TRBJ2-7*01
7273	TGTGCTACTTTGGATAGCAGCTATAAATTGATCTTC	CATLDSSYKLIF	TRUE	TRAV17*01	NA	TRAJ12*01
6448	TGTGCCAGCAGCTACGAACCGGGACTCGCAGAGACCCAGTACTTC	CASSYEPGLAETQYF	TRUE	TRBV7-9*04	TRBD2*01	TRBJ2-5*01
5643	TGTGCCGTGAACATGGGGGGAGCACTTACTTTT	CAVNMGGALTF	TRUE	TRAV12-2*01	NA	TRAJ5*01
5391	TGTGCAGGGAACCCTTGGTTGGCCCAGAAGCTGGTATTT	CAGNPWLAQKLVF	TRUE	TRAV27*01	NA	TRAJ54*01
5199	TGTGCAGAGAAAGGTGGTGGTACTAGCTATGGAAAGCTGACATTT	CAEKGGGTSYGKLTF	TRUE	TRAV5*01	NA	TRAJ52*01
5075	TGTGCCAGCAGCTTAGAACTAGCGATGGGAGAGACCCAGTACTTC	CASSLELAMGETQYF	TRUE	TRBV7-9*03	TRBD2*01	TRBJ2-5*01
4497	TGTGCCACTAGGGGAGACTCCTACGAGCAGTACTTC	CATRGDSYEQYF	TRUE	TRBV19*03	NA	TRBJ2-7*01
4389	TGTGCTCCCCTCGGAGGCTTTGGGAATGTGCTGCATTGCG	CAPLGGF_GMCCIA	FALSE	TRAV41*01	NA	TRAJ35*01
3945	TGTGCTGTTCTGTATTCTGGGGGTTACCAGAAAGTTACCTTT	CAVLYSGGYQKVTF	TRUE	TRAV22*01	NA	TRAJ13*02
3300	TGTGCCAGCAGTGAAGAGGAAACAGGGGGTTCACCCCTCCACTTT	CASSEEETGGSPLHF	TRUE	TRBV2*03	TRBD1*01	TRBJ1-6*01
2926	TGTGCCAGCACCCACACTGGATCGGAAGCTTTCTTT	CASTHTGSEAFF	TRUE	TRBV6-2*01	NA	TRBJ1-1*01
2712	TGTGCAGAGTCCTGAGGTCTGGGGCTGGGAGTTACCAACTCACTTTC	CAES*GLG_GSYQLTF	FALSE	TRAV5*01	NA	TRAJ28*01
2335	TGTGCCAGCAGCTACGAACCGGGACTCGCAGAGACCCAGTACTTC	CASSYEPGLAETQYF	TRUE	TRBV7-9*03	TRBD2*01	TRBJ2-5*01
2268	TGCGCTGTGAGAGAAGCAGCGGAGGCTACAATAAGCTGATTTTT	CAVREAA_GYNKLIF	FALSE	TRAV1-1*01	NA	TRAJ4*01
2062	TGCCTCGTGGGTGACGGGACTGGAGGCTTCAAAACTATCTTT	CLVGDGTGGFKTIF	TRUE	TRAV4*01	NA	TRAJ9*01
1731	TGCATCCTGAGAGACGTGTGTGGGTGGTACTAGCTATGGAAAGCTGACATTT	CILRDVCGW_TSYGKLTF	FALSE	TRAV26-2*01	NA	TRAJ52*01
1613	TGTGCAGAGAGAGGGTGGAACAATGACATGCGCTTT	CAERGWNNDMRF	TRUE	TRAV5*01	NA	TRAJ43*01
1584	TGCGCCAGCAGCCAAGACCCAGGCCTGGGCTACGAGCAGTACTTC	CASSQDPGLGYEQYF	TRUE	TRBV4-1*01	NA	TRBJ2-7*01
1515	TGTGCCACTAGGGGAGACTCCTACGAGCAGTACTTC	CATRGDSYEQYF	TRUE	TRBV19*01	NA	TRBJ2-7*01
1476	TGTGCTCCGAAGGCAGGAACTGCTCTGATCTTT	CAPKAGTALIF	TRUE	TRAV21*02	NA	TRAJ15*01
1384	TGTGCTGTGACTGACAGCTGGGGGAAATTGCAGTTT	CAVTDSWGKLQF	TRUE	TRAV21*01	NA	TRAJ24*02
1362	TGTGCTCGTCTAACGACTACAAGCTCAGCTTT	CARLT_YKLSF	FALSE	TRAV20*04	NA	TRAJ20*01
1297	TGTGCCAGCATAAGCACCCTGGGAGTTGAAAAACTGTTTTTT	CASISTLGVEKLFF	TRUE	TRBV2*02	TRBD1*01	TRBJ1-4*01
1244	TGTGCCAGCAGTTTAGCTCTAGACGAGCAGTACTTC	CASSLALDEQYF	TRUE	TRBV12-4*01	NA	TRBJ2-7*01
1241	TGTGCCAGCAGTGAAGAGGAAACAGGGGGTTCACCCCTCCACTTT	CASSEEETGGSPLHF	TRUE	TRBV2*01	TRBD1*01	TRBJ1-6*01
1224	TGTGCCGGGACGGAGGCTGGGAGTTACCAACTCACTTTC	CAGTEAGSYQLTF	TRUE	TRAV12-2*02	NA	TRAJ28*01
1181	TGTGCCAGCAGTGACTCGACAGACTACTAATTCACCCCTCCACTTT	CASSDSTD_TNSPLHF	FALSE	TRBV6-4*02	NA	TRBJ1-6*01
1152	TGCAGTGCTGGGGGCGTGGGGCCTGTTGATGGCTACACCTTC	CSAGGVGPVDGYTF	TRUE	TRBV20-1*02	TRBD1*01	TRBJ1-2*01
1021	TGCGCCAGCAATGCCGGGACAGGGGACGAGCAGTACTTC	CASNAGTGDEQYF	TRUE	TRBV10-1*01	TRBD1*01	TRBJ2-7*01
963	TGTGCCGCGTCTCGGGGCTGTGAGCCAAAAACATTCAGTACTTC	CAASRGC_AKNIQYF	FALSE	TRBV3-1*02	TRBD1*01	TRBJ2-4*01
951	TGTGCCAGCAGCTTAAGTCTCGGCCAGGACGAGCAGTACTTC	CASSLSLGQDEQYF	TRUE	TRBV11-3*02	TRBD2*01	TRBJ2-7*01
815	TGTGCCAGCAGTGGGGACTTGCCCGAGCAGTACTTC	CASSGDLPEQYF	TRUE	TRBV6-1*01	TRBD2*01	TRBJ2-7*01
612	TGTGCCAGCAGCGGGAAAGAGCCCGGGGAGCTGTTTTTT	CASSGKEPGELFF	TRUE	TRBV4-2*02	NA	TRBJ2-2*01
611	TGTGCTACGGAGGATAGCAACTATCAGTTAATCTGG	CATEDSNYQLIW	TRUE	TRAV17*01	NA	TRAJ33*01
598	TGTGCTCGTCTAACGACTACAAGCTCAGCTTT	CARLT_YKLSF	FALSE	TRAV20*01	NA	TRAJ20*01
598	TGTGCAGAGAGGGATAGCAACTATCAGTTAATCTGG	CAERDSNYQLIW	TRUE	TRAV13-2*02	NA	TRAJ33*01
503	TGTGCCAGCATAAGCACCCTGGGAGTTGAAAAACTGTTTTTT	CASISTLGVEKLFF	TRUE	TRBV2*01	TRBD1*01	TRBJ1-4*01
464	TGTGCTGTGCAGGTGCCTCCGGAGCTGCAGGCAACAAGCTAACTTTT	CAVQVPPE_AGNKLTF	FALSE	TRAV20*02	NA	TRAJ17*01
461	TGTGCCAGCAGTTTAGCTCTAGACGAGCAGTACTTC	CASSLALDEQYF	TRUE	TRBV12-3*01	NA	TRBJ2-7*01
352	TGTGCCAGCAGCTTAAGTCTCGGCCAGGACGAGCAGTACTTC	CASSLSLGQDEQYF	TRUE	TRBV11-3*01	TRBD2*01	TRBJ2-7*01
231	TGTGCCAGCAGCGGGAAAGAGCCCGGGGAGCTGTTTTTT	CASSGKEPGELFF	TRUE	TRBV4-2*01	NA	TRBJ2-2*01
214	TGTGCAGAGAGGGATAGCAACTATCAGTTAATCTGG	CAERDSNYQLIW	TRUE	TRAV13-2*01	NA	TRAJ33*01
163	TGTGCTGTGCAGGTGCCTCCGGAGCTGCAGGCAACAAGCTAACTTTT	CAVQVPPE_AGNKLTF	FALSE	TRAV20*01	NA	TRAJ17*01
73	TGCGCCAGGGTCCCCAGGGCTGTGCGAACACCGGGGAGCTGTTTTTT	CARVPRAV_NTGELFF	FALSE	TRBV5-1*01	TRBD1*01	TRBJ2-2*01
61	TGTGCCGCGTCTCGGGGCTGTGAGCCAAAAACATTCAGTACTTC	CAASRGC_AKNIQYF	FALSE	TRBV14*02	TRBD2*01	TRBJ2-4*01
58	TGTGGCTGTGAGAATAGTGGAGGTAGCAACTATAAACTGACATTT	CGCENSGGSNYKLTF	TRUE	TRAV3*01	NA	TRAJ53*01
55	TGTGCCAGCAGTGGGGACTTGTCCGAGCAGTACTTC	CASSGDLSEQYF	TRUE	TRBV6-1*01	TRBD2*01	TRBJ2-7*01
	50 reads threshold
37	TGCGCCAGCAGCCAACTCGGGACGGGTAGCTCCTACGAGCAGTACTTC	CASSQLGTGSSYEQYF	TRUE	TRBV4-1*01	TRBD1*01	TRBJ2-7*01
25	TGTGCTGAGAGGCGCTGCTGGGCGTCTGGGCGGAGGACTCCTGGTTCTGGGTGCTGGGAGAGCGATGGGGCTCTCAGCGGTGGGAAGGACCCGAGCTGAGTCTGGGACAGCAGAGCGGGCAGCACCGGTTTTTGTCCTGGGCCTCCAGGCTGTGAGCACAGATACGCAGTATTTT	CAERRCWASGRRTPGSGCWESDGALSGGK_TRAESGTAERAAPVFVLGLQAVSTDTQYF	FALSE	TRBV7-6*02	TRBD1*01	TRBJ2-3*01
20	TGTGCCAGCAGTGCCACATTGGGGGCAGGTAACTACGAGCAGTACTTC	CASSATLGAGNYEQYF	TRUE	TRBV2*02	TRBD1*01	TRBJ2-7*01
20	TGTGCTCGAGGGGATGCAGGCAACATGCTCACCTTT	CARGDAGNMLTF	TRUE	TRAV8-3*01	NA	TRAJ39*01
18	TATGCCTTCAATGTGATTTTCACCTTGACCCCTGTCACTGTGTGAACACTGAAGCTTTCTTT	YAFNVIFTLT_CHCVNTEAFF	FALSE	TRBV26*01	TRBD1*01	TRBJ1-1*01
16	TGTGCAATGAGAGAGGTTAACACCAATGCAGGCAAATCAACCTTT	CAMREVNTNAGKSTF	TRUE	TRAV14/DV4*02	NA	TRAJ27*01
16	TGTGCTCTCCGAGGGGAAAGCTTATCTTC	CALRG_KLIF	FALSE	TRAV6*02	NA	TRAJ23*01
13	TGTGCGAACACCGGGGAGCTGTTTTTT	CANTGELFF	TRUE	TRBV4-2*02	NA	TRBJ2-2*01
10	TGTAGCAATCAGCCCCAGCATTTT	CSNQPQHF	TRUE	TRBV15*01	NA	TRBJ1-5*01
6	TGTGCTGAGAGGCGCTGCTGGGC	CAER_LLG	FALSE	TRBV6-6*05	NA	TRBJ2-2P*01
4	TGTGCAATGAGAGAGGTTAACACCAATGCAGGCAAATCAACCTTT	CAMREVNTNAGKSTF	TRUE	TRAV14/DV4*01	NA	TRAJ27*01
3	TGTGCTCTCCGAGGGGAAAGCTTATCTTC	CALRG_KLIF	FALSE	TRAV6*01	NA	TRAJ23*01
2	TGTGCCAGCAGCTACGAACCGGCCCCCCCCCCCCCCCCCCCCCCC	CASSYEPAPPPPPPP	TRUE	TRBV7-9*04	TRBD2*01	TRBJ2-5*01
2	TGTGATACTCACGGGAGGAGGAAACAAACTCACCTTT	CDTHGR_GNKLTF	FALSE	TRAV34*01	NA	TRAJ10*01
2	TGTGCCAGCAGCGTGACAGGGGGTGAGCAGTTCTTC	CASSVTGGEQFF	TRUE	TRBV6-2*01	TRBD1*01	TRBJ2-1*01
1	TGTGCTGTGAGATTCATACTCACGGGAGGAGGAAACAAACTCACCTTT	CAVRFILTGGGNKLTF	TRUE	TRAV1-2*01	NA	TRAJ10*01
1	TGTGCCAGCAGTGCCACATTGGGGGCAGGTAACTACGAGCAGTACTTC	CASSATLGAGNYEQYF	TRUE	TRBV2*01	TRBD1*01	TRBJ2-7*01
1	TGTGCCAGCAGTCCGTCGTCCGCCCCTAATGAAAAACTGTTTTTT	CASSPSSAPNEKLFF	TRUE	TRBV28*01	TRBD1*01	TRBJ1-4*01
1	TAGCAGTGGTATCAACGCAGAGTACATGGGCAGCAGAGCGGGCAGCACCGGTTTTTGTCCTGGGCCTCCAGGCTGTGAGCACAGATACGCAGTATTTT	*QWYQRRVHGQQSGQH_VFVLGLQAVSTDTQYF	FALSE	TRBV20/OR9-2*02	TRBD1*01	TRBJ2-3*01
1	TGTGCTCTTCCGATCTAAGCAGTGGTATCAACGCAGAGTACATGGGGGAAAGCTTATCTTC	CALPI*AVVS_RRVHGGKLIF	FALSE	TRAV16*01	NA	TRAJ23*01
1	TAGCAGTGGTATCAACGCAGAGTACATGGGAAAAACATTCAGTACTTC	*QWYQRRVHGKNIQYF	FALSE	TRBV20-1*02	NA	TRBJ2-4*01
1	TGTGCCAGCAGTTCCGGGACTGCCCCTAATGAAAAACTGTTTTTT	CASSSGTAPNEKLFF	TRUE	TRBV28*01	TRBD2*01	TRBJ1-4*01
1	TGTGCTCTTGGGGAACTACCGGACTACAAGCTCAGCTTT	CALGELPDYKLSF	TRUE	TRDV1*01	NA	TRDJ1*01
1	TGTGCCAGCAGCTCGAGTGACGAGTACGAGCAGTACTTC	CASSSSDEYEQYF	TRUE	TRBV5-4*01	NA	TRBJ2-7*01
1	TAGCAGTGGTATCAACGCAGAGTACATGGGGTTCTTC	*QWYQR_EYMGFF	FALSE	TRBV20-1*02	NA	TRBJ2-1*01
1	CCCCCCCCCCCCCCCGCGCTTGATGAGCAGTTCTTC	PPPPPALDEQFF	TRUE	TRBV12-3*01	TRBD2*01	TRBJ2-1*01
1	TGTGCTCCCCGGGCCCCAGGAAAGCTTATCTTC	CAPRAPGKLIF	TRUE	TRAV2*01	NA	TRAJ23*01
1	TGTGCTGGGAACCAGGGAGGAAAGCTTTTGTTG	CAGNQGGKLLL	TRUE	TRAV21*02	NA	TRAJ23*01

## Sheet: 8 JZX IPS
cloneCount	targetSequences	aaSeqCDR3	productiveTCR	V_gene	D_gene	J_gene
197067	TGTGCCAGCAGCTTAGAGTTGAGCGCGGGAGAGACCCAGTACTTC	CASSLELSAGETQYF	TRUE	TRBV7-9*03	TRBD2*01	TRBJ2-5*01
157753	TGTGCCAGCAGCGTAGAGGGGGGGTACTACAATGAGCAGTTCTTC	CASSVEGGYYNEQFF	TRUE	TRBV9*01	TRBD2*01	TRBJ2-1*01
101784	TGTGCCAGCAGCTTTCCCCCGGGACAGGCCGCCTACGAGCAGTACTTC	CASSFPPGQAAYEQYF	TRUE	TRBV11-2*01	TRBD1*01	TRBJ2-7*01
96230	TGTGCTCTTGGGGAACTAACTGAAAGCCAAGGAAATCTCATCTTT	CALGELTESQGNLIF	TRUE	TRDV1*01	NA	TRDJ1*01
86938	TGCAGTGCTAGAGATCCCAGGGGGGAGCCCCAGCATTTT	CSARDPRGEPQHF	TRUE	TRBV20-1*01	TRBD1*01	TRBJ1-5*01
72728	TGTGCCGTGACTCCTGCCAGACTCATGTTT	CAVTPARLMF	TRUE	TRAV12-2*01	NA	TRAJ31*01
68141	TGTGCCAGCAGTTTAGCGCTCGATGAGCAGTTCTTC	CASSLALDEQFF	TRUE	TRBV12-4*01	NA	TRBJ2-1*01
65928	CCTCATGGCTCTAGCAACACAGGCAAACTAATCTTT	PHGSSNTGKLIF	TRUE	TRAV27*02	NA	TRAJ37*02
65759	TGTGCCAGCAGCGTAGAAGGGGGTTACTACAATGAGCAGTTCTTC	CASSVEGGYYNEQFF	TRUE	TRBV9*01	TRBD1*01	TRBJ2-1*01
59788	TGTGCTGGGAACCAGGGAGGAAAGCTTATCTTC	CAGNQGGKLIF	TRUE	TRAV21*02	NA	TRAJ23*01
52546	TGTGCTGTGGGGGGGGTTATGACCGACAAGCTCATCTTT	CAVGGVMTDKLIF	TRUE	TRAV22*01	NA	TRAJ34*01
46107	TGTGCCAGTCGGGGGGACTCCTACGAGCAGTACTTC	CASRGDSYEQYF	TRUE	TRBV19*02	TRBD2*01	TRBJ2-7*01
44659	TGTGCTATTGACTCAGGAACCTACAAATACATCTTT	CAIDSGTYKYIF	TRUE	TRAV17*01	NA	TRAJ40*01
40999	TGTGCTCTTGGGGAACTAGAGAATTATGGAGGAAGCCAAGGAAATCTCATCTTT	CALGELENYGGSQGNLIF	TRUE	TRDV1*01	TRDD2*01	TRDJ1*01
35367	TGTGTGGTGATTGAAGGAACCTACAAATACATCTTT	CVVIEGTYKYIF	TRUE	TRAV10*01	NA	TRAJ40*01
26865	TGTGCCCCAACGACCTAAGGGGTGGCTACAATAAGCTGATTTTT	CAPTT*G_GYNKLIF	FALSE	TRAV6*02	NA	TRAJ4*01
24029	CCTCATGGCTCTAGCAACACAGGCAAACTAATCTTT	PHGSSNTGKLIF	TRUE	TRAV27*01	NA	TRAJ37*02
23416	TGTGCTCCAACTGACAGCTGGGGGAAATTGCAGTTT	CAPTDSWGKLQF	TRUE	TRAV22*01	NA	TRAJ24*02
18116	TGCAGTGCTACCCCACCCCAGGGGGGACTAGCGGGTCTGTCCTACGAGCAGTACTTC	CSATPPQGGLAGLSYEQYF	TRUE	TRBV20-1*02	TRBD2*01	TRBJ2-7*01
18062	TGTGCTCTGAGTGATCGGGTGGTGCTACAAACAAGCTCATCTTT	CALSDRV_ATNKLIF	FALSE	TRAV9-2*01	NA	TRAJ32*02
17900	TGTGCCAGTAGTATTTCGAGGGACAGCCCTTGGGATGAGCAGTTCTTC	CASSISRDSPWDEQFF	TRUE	TRBV19*01	TRBD1*01	TRBJ2-1*01
16860	TGTGCCAGCAGCTTTAGGGGCCGAAGGGAGCAGTACTTC	CASSFRGRREQYF	TRUE	TRBV9*03	TRBD2*01	TRBJ2-7*01
16497	TGTGCAGCGTCCTCAGGAACCTACAAATACATCTTT	CAASSGTYKYIF	TRUE	TRAV27*01	NA	TRAJ40*01
15252	TGTGCAGAGAGGGGGTGGGACAATGACATGCGCTTT	CAERGWDNDMRF	TRUE	TRAV5*01	NA	TRAJ43*01
9783	TGTGCTGTGAGTGCTGCAGGCAACAAGCTAACTTTT	CAVSAAGNKLTF	TRUE	TRAV8-4*04	NA	TRAJ17*01
8672	TGTGCTCCCGAAAGGTTCTGCAAGGCAACTGACCTTT	CAPERF_ARQLTF	FALSE	TRAV21*02	NA	TRAJ22*01
7642	TGTGCCAGCAGCTTAGAGTTGAGTAGCGAAGAGACCCAGTACTTC	CASSLELSSEETQYF	TRUE	TRBV7-9*03	NA	TRBJ2-5*01
7118	TGCATCGTCAGAGTGCACCGGTAACCAGTTCTATTTT	CIVRVH_GNQFYF	FALSE	TRAV26-1*01	NA	TRAJ49*01
6804	TGTGCCAGCAGTTTATGGACAGATAATCGGGATGGCTACACCTTC	CASSLWTDNRDGYTF	TRUE	TRBV27*01	NA	TRBJ1-2*01
6769	TGTGCACGTACCTCAGGAACCTACAAATACATCTTT	CARTSGTYKYIF	TRUE	TRAV5*01	NA	TRAJ40*01
6503	TGTGCCAGCAGCCCTAGCGGGAACCTTGGGAAGTTCTTC	CASSPSGNLGKFF	TRUE	TRBV7-2*01	NA	TRBJ2-1*01
6439	TGTGCCAGCAGCCCATCGTTTGGCTCCAATGAGCAGTTCTTC	CASSPSFGSNEQFF	TRUE	TRBV11-3*02	NA	TRBJ2-1*01
6004	TGTGCCAGCAGTTTAGCGCTAGATGAGCAGTTCTTC	CASSLALDEQFF	TRUE	TRBV12-4*01	NA	TRBJ2-1*01
5958	TGTGCTCTCCATGTGGTGCTACAAACAAGCTCATCTTT	CALHVV_TNKLIF	FALSE	TRAV16*01	NA	TRAJ32*02
5327	TGTGCTACGGAGGATAGCAACTATCAGTTAATCTGG	CATEDSNYQLIW	TRUE	TRAV17*01	NA	TRAJ33*01
4907	TGTGCTCTGACAGGAACCAGGCAGGAACTGCTCTGATCTTT	CALTGTR_GTALIF	FALSE	TRAV9-2*01	NA	TRAJ15*01
4475	TGTGCCAGTAGTATAGTTCCGTATGTCGGGGAGCTGTTTTTT	CASSIVPYVGELFF	TRUE	TRBV19*01	NA	TRBJ2-2*01
4033	TGTGCTGTGACTGACAGCTGGGGGAAATTGCAGTTT	CAVTDSWGKLQF	TRUE	TRAV21*01	NA	TRAJ24*02
3960	TGTGCAGAGGTCTCAGGAACCTACAAATACATCTTT	CAEVSGTYKYIF	TRUE	TRAV5*01	NA	TRAJ40*01
3583	TGCGCCAGCAGCTATTTTCACGTTAAGGTGACTAGCGGGAGGGCCTTGGCTACGAGCAGTACTTC	CASSYFHVKVT_REGLGYEQYF	FALSE	TRBV5-1*01	TRBD2*02	TRBJ2-7*01
2367	TGTGCCAGCACCCCTGGGGAGGGGAGCACTGAAGCTTTCTTT	CASTPGEGSTEAFF	TRUE	TRBV7-8*02	TRBD2*02	TRBJ1-1*01
2291	TGTGCCAGCAGCTTAGAACTAGCGATGGGAGAGACCCAGTACTTC	CASSLELAMGETQYF	TRUE	TRBV7-9*03	TRBD2*01	TRBJ2-5*01
2204	TGTGCCAGCAGTCTCTCCGGGGGGCCTAATGAAAAACTGTTTTTT	CASSLSGGPNEKLFF	TRUE	TRBV28*01	TRBD2*01	TRBJ1-4*01
2152	TGTGCTACGGAGGCTAGCAACTATCAGTTAATCTGG	CATEASNYQLIW	TRUE	TRAV17*01	NA	TRAJ33*01
1964	TGTGCCAGCAGCCCGGGTGAGGCATCTGAAAAACTGTTTTTT	CASSPGEASEKLFF	TRUE	TRBV7-8*02	TRBD1*01	TRBJ1-4*01
1941	TGTGCTTATATGAGAGGAGGTGCTGACGGACTCACCTTT	CAYMRGGADGLTF	TRUE	TRAV38-2/DV8*01	NA	TRAJ45*01
1605	TGTGCAGCAAGCCGTGGGTCTGGGGGTTACCAGAAAGTTACCTTT	CAASRGSGGYQKVTF	TRUE	TRAV23/DV6*01	NA	TRAJ13*02
1596	TGCGCCAGCAGTGACGGGAGACTAGCGGGAGGGGTCTACGAGCAGTACTTC	CASSDGRLAGGVYEQYF	TRUE	TRBV10-2*01	TRBD2*02	TRBJ2-7*01
1578	TGTGCTGTGGACTCTGGGGCTGGGAGTTACCAACTCACTTTC	CAVDSGAGSYQLTF	TRUE	TRAV22*01	NA	TRAJ28*01
1547	TGTGCTGTGACTGACAGCTGGGGGAAATTGCAGTTT	CAVTDSWGKLQF	TRUE	TRAV21*02	NA	TRAJ24*02
1499	TGTGCCGTGAACCCCGACAAGCTCATCTTT	CAVNPDKLIF	TRUE	TRAV12-2*01	NA	TRAJ34*01
1481	TGTGCCAGTAGTATAGTTCCGTATGTCGGGGAGCTGTTTTTT	CASSIVPYVGELFF	TRUE	TRBV19*02	NA	TRBJ2-2*01
1394	TGTGCCAGCAGCTTAGAACTTGCAATGGATGAAAAACTGTTTTTT	CASSLELAMDEKLFF	TRUE	TRBV7-9*03	NA	TRBJ1-4*01
1334	TGTGCAGCAAGCATCAGAGGAGGTGCTGACGGACTCACCTTT	CAASIRGGADGLTF	TRUE	TRAV23/DV6*01	NA	TRAJ45*01
1198	TGTGCCAGCAGCAAACCGGGACTAGCGGGTTCCACCGGGGAGCTGTTTTTT	CASSKPGLAGSTGELFF	TRUE	TRBV11-3*02	TRBD2*01	TRBJ2-2*01
1082	TGTGCCAGCAGCTTAGATCCCTCGGGACAGGGGTACGAGCAGTACTTC	CASSLDPSGQGYEQYF	TRUE	TRBV11-2*01	TRBD1*01	TRBJ2-7*01
1076	TGTGTAGCGTCCTCAGGAACCTACAAATACATCTTT	CVASSGTYKYIF	TRUE	TRAV27*01	NA	TRAJ40*01
794	TGTGCCAGCAGTTTCTCGGGAGCCCCTAATGAAAAACTGTTTTTT	CASSFSGAPNEKLFF	TRUE	TRBV28*01	TRBD2*02	TRBJ1-4*01
742	TGTGCCAGCAGTTCCCTGATAGGTACCTACGAGCAGTACTTC	CASSSLIGTYEQYF	TRUE	TRBV6-6*01	TRBD1*01	TRBJ2-7*01
689	TGTGCCAGCAGCGCTGGCCGTGGGAACAGGGGGGACGATGAGCAGTTCTTC	CASSAGRGNRGDDEQFF	TRUE	TRBV9*03	TRBD1*01	TRBJ2-1*01
647	TGTGCCAGCAGTACCGCCGGGACGCCGAATGAAAAACTGTTTTTT	CASSTAGTPNEKLFF	TRUE	TRBV28*01	TRBD1*01	TRBJ1-4*01
602	TGTGCAGCAAGCGGGGGCCGGTATTATACTGGAGCCAATAGTAAGCTGACATTT	CAASGGRYYTGANSKLTF	TRUE	TRAV29/DV5*01	NA	TRAJ56*01
582	TGTGCCAGCAGCTTCCCCGGGACGGATCTCCTACGAGCAGTACTTC	CASSFPGT_ISYEQYF	FALSE	TRBV5-6*01	TRBD1*01	TRBJ2-7*01
421	TGTGCTGTGAGTGGATGAATTATGGAGGAAGCCAAGGAAATCTCATCTTT	CAVSG*IM_GSQGNLIF	FALSE	TRAV8-4*01	NA	TRAJ42*01
145	TGTGCTGAGAGGCGCTGCTGGGCGTCTGGGCGGAGGACTCCTGGTTCTGGGTGCTGGGAGAGCGATGGGGCTCTCAGCGGTGGGAAGGACCCGAGCTGAGTCTGGGACAGCAGAGCGGGCAGCACCGGTTTTTGTCCTGGGCCTCCAGGCTGTGAGCACAGATACGCAGTATTTT	CAERRCWASGRRTPGSGCWESDGALSGGK_TRAESGTAERAAPVFVLGLQAVSTDTQYF	FALSE	TRBV14*02	TRBD1*01	TRBJ2-3*01
86	TGTGCTCACGATATCACTCCTTCCAGAAGATCTTTAGGGAAAACTTAGTTCAGTTTCTAGGAGGTTTTTGCTCAGCCGAAGATCACTGTGTGAATAATAATGCAGGCAACATGCTCACCTTT	CAHDITPSRRSLGKT*FSF*_GFCSAEDHCVNNNAGNMLTF	FALSE	TRAV9-1*01	NA	TRAJ39*01
65	TGCAGTGCTAGAGATCCCAGGGGGGACTAGCGGGTCTGTCCTACGAGCAGTACTTC	CSARDPRGD_AGLSYEQYF	FALSE	TRBV20-1*01	TRBD2*01	TRBJ2-7*01
50	TATGCTGTGAGTGGTCTGATTTTCTCAGCATCTCTGGGGTTTTTGCAAAGAAAGGAAACTCTGTGCATACTCTGGGGCTGGGAGTTACCAACTCACTTTC	YAVSGLIFSASLGFLQR_RKLCAYSGAGSYQLTF	FALSE	TRAV8-4*05	NA	TRAJ28*01
36	TGCAGTGCTACCCCACCCCAGGGGGGAGCCCCAGCATTTT	CSATPPQ_GEPQHF	FALSE	TRBV20-1*01	TRBD1*01	TRBJ1-5*01
	50 reads threshold
26	TGTGCAGAGATCTTTTCTGGTGGCTACAATAAGCTGATTTTT	CAEIFSGGYNKLIF	TRUE	TRAV5*01	NA	TRAJ4*01
22	GGGCCAGGCACGCGGCTCCTGGTGCTCGGTGAGCGCGGGCTGCTGGGGCGCGGGCGCGGGCGGCTTGGGTCTGGTTTTTGCGGGGAGTCCCCGGGCTGTGCTCTGGGGCCAACGTCCTGACTTTC	GPGTRLLVLGERGLLGRGRGR_WVWFLRGVPGLCSGANVLTF	FALSE	TRBV13*02	TRBD2*01	TRBJ2-6*01
21	TATGCTGTGAGTGGTCTGATTTTCTCAGCATCTCTGGGGTTTTTGCAAAGAAAGGAAACTCTGTGCATACTCTGGGGCTGGGAGTTACCAACTCACTTTC	YAVSGLIFSASLGFLQR_RKLCAYSGAGSYQLTF	FALSE	TRAV8-6*01	NA	TRAJ28*01
21	TGTGCTGAGAGGCGCTGCTGGGC	CAER_LLG	FALSE	TRBV6-6*05	NA	TRBJ2-2P*01
13	TGTGCCAGCAGGACAGGGTCTACGGATGAAAAACTGTTTTTT	CASRTGSTDEKLFF	TRUE	TRBV6-1*01	TRBD1*01	TRBJ1-4*01
11	TGTGCAGGAGTCGGGGGGAGTCTTCTGGTTCTGCAAGGCAACTGACCTTT	CAGVGGSL_GSARQLTF	FALSE	TRAV27*01	NA	TRAJ22*01
9	TATGCCTTCAATGTGATTTTCACCTTGACCCCTGTCACTGTGTGAACACTGAAGCTTTCTTT	YAFNVIFTLT_CHCVNTEAFF	FALSE	TRBV26*01	TRBD1*01	TRBJ1-1*01
7	TGCGCCAGCAATACCGGGACAGGGGATGAGCAGTTCTTC	CASNTGTGDEQFF	TRUE	TRBV10-1*01	TRBD1*01	TRBJ2-1*01
6	TGTGCCAGCAGTTTAAAGCGGGAGACCTACAATGAGCAGTTCTTC	CASSLKRETYNEQFF	TRUE	TRBV27*01	TRBD2*02	TRBJ2-1*01
6	TGTGCCAGCAGCTCGAGTGACGAGTACGAGCAGTACTTC	CASSSSDEYEQYF	TRUE	TRBV5-4*01	NA	TRBJ2-7*01
5	TGTGCTGTGGACCCCATACTCACGGGAGGAGGAAACAAACTCACCTTT	CAVDPILTGGGNKLTF	TRUE	TRAV8-3*01	NA	TRAJ10*01
5	TGTGCCAGCGGTTTAACGAGTCAGCCCCAGCATTTT	CASGLTSQPQHF	TRUE	TRBV6-2*01	NA	TRBJ1-5*01
3	TGCGCCAGCAGCCCGGATCGGGGGGCCGACTATGGCTACACCTTC	CASSPDRGADYGYTF	TRUE	TRBV5-1*01	TRBD2*01	TRBJ1-2*01
3	TGTGCTTATAGGACCTTTATATCTAACTTTGGAAATGAGAAATTAACCTTT	CAYRTFISNFGNEKLTF	TRUE	TRAV38-2/DV8*01	NA	TRAJ48*01
3	TGTGCCAGCAGTTTATGGACGGATCACCGTAGTGGCTACACCTTC	CASSLWTDHRSGYTF	TRUE	TRBV27*01	NA	TRBJ1-2*01
3	TGTGCCAGCAGTCCGTCGTCCGCCCCTAATGAAAAACTGTTTTTT	CASSPSSAPNEKLFF	TRUE	TRBV28*01	TRBD1*01	TRBJ1-4*01
2	TGTGCCAGCAGCTTAGATCCCTCGGGACAGGCCGCCTACGAGCAGTACTTC	CASSLDPSGQAAYEQYF	TRUE	TRBV11-2*01	TRBD1*01	TRBJ2-7*01
2	TGTGCCAGCAGCTTTGAGGACAGTTCCTACGAGCAGTACTTC	CASSFEDSSYEQYF	TRUE	TRBV7-8*01	NA	TRBJ2-7*01
2	TGTGCCAGCAGCTTAGGGGGGACAGGGTCTGAAGCTTTCTTT	CASSLGGTGSEAFF	TRUE	TRBV7-9*03	TRBD1*01	TRBJ1-1*01
2	TGTGCCAGCAGCGAGGGGAAAGAGCCCGGGGAGCTGTTTTTT	CASSEGKEPGELFF	TRUE	TRBV4-2*01	TRBD1*01	TRBJ2-2*01
2	TGTGCCAGCAGCGTAGAGGGGCCGAAGGGAGCAGTACTTC	CASSVEG_RREQYF	FALSE	TRBV9*01	TRBD2*01	TRBJ2-7*01
2	TGTAGCAATCAGCCCCAGCATTTT	CSNQPQHF	TRUE	TRBV15*01	NA	TRBJ1-5*01
1	TGTGCTGTGAGGCCTGATAACCAGGGAGGAAAGCTTATCTTC	CAVRPDNQGGKLIF	TRUE	TRAV21*01	NA	TRAJ23*01
1	TGTGCCAGCAGCTTAGGGGGGACAGGGTCTGAAGCTTTCTTT	CASSLGGTGSEAFF	TRUE	TRBV7-9*01	TRBD1*01	TRBJ1-1*01
1	TGTGCCAGCAGTTACACCACGAGTGTCGAGCAGTTCTTC	CASSYTTSVEQFF	TRUE	TRBV6-2*01	NA	TRBJ2-1*01
1	TGTGCCTGGCACCAGGGGGCGGAGACCCAGTACTTC	CAWHQGAETQYF	TRUE	TRBV30*01	TRBD1*01	TRBJ2-5*01
1	TGTGTAAGCAGCTTCTGGAAGGAAGGGCCCACACCAGCTCCTCTGGGGTTTGCCACACTCATGATGCACTGTGTAGCAATCAGCCCCAGCATTTT	CVSSFWKEGPTPAPLG_CHTHDALCSNQPQHF	FALSE	TRBV7-8*01	TRBD2*02	TRBJ1-5*01
1	TAGCAGTGGTATCAACGCAGAGTACATGGGACACTCATGATGCACTGTGTAGCAATCAGCCCCAGCATTTT	*QWYQRRVHGTL_DALCSNQPQHF	FALSE	TRBV20/OR9-2*02	TRBD1*01	TRBJ1-5*01
1	TAGCAGTGGTATCAACGCAGAGTACATGGGACTCATGATGCACTGTGTAGCAATCAGCCCCAGCATTTT	*QWYQRRVHGTHDALCSNQPQHF	FALSE	TRBV20-1*02	TRBD2*01	TRBJ1-5*01
1	TGTGCAGGAGTCGGGGGGAGTCTTCTGGTTCTGCAAGGCAACCGACCTTT	CAGVGGSL_GSARQPTF	FALSE	TRAV27*01	NA	TRAJ22*01
1	TAGCAGTGGTATCAACGCAGAGTACATGGGAATCAGCCCCAGCATTTT	*QWYQRRVHGNQPQHF	FALSE	TRBV20-1*02	NA	TRBJ1-5*01
1	TGTGCCAGCAGCTTTCCCCCGGGACAGGGGTACGAGCAGTACTTC	CASSFPPGQGYEQYF	TRUE	TRBV11-2*01	TRBD1*01	TRBJ2-7*01
1	TGTGCAATGAGAGAGGTTAACACCAATGCAGGCAAATCAACCTTT	CAMREVNTNAGKSTF	TRUE	TRAV14/DV4*01	NA	TRAJ27*01
1	TGCGCCAGCAGCCCGGATTGGGGGGCCGACTATGGCTACACCTTC	CASSPDWGADYGYTF	TRUE	TRBV5-1*01	TRBD2*01	TRBJ1-2*01
1	TGTGCTTTGAAGGGAAGAAGCCAAGGAAATCTCATCTTT	CALKGRSQGNLIF	TRUE	TRAV38-2/DV8*01	NA	TRAJ42*01
1	TGTGCTGTGCAGGGGGAAGGAACCTACAAATACATCTTT	CAVQGEGTYKYIF	TRUE	TRAV20*01	NA	TRAJ40*01
1	TGTGCAGCAATCTCAGGAACCTACAAATACATCTTT	CAAISGTYKYIF	TRUE	TRAV13-1*01	NA	TRAJ40*01
1	TGCAGTGCTGGAAGCGGGGGGGGCGAGCAGTACTTC	CSAGSGGGEQYF	TRUE	TRBV20-1*01	TRBD2*01	TRBJ2-7*01
